**ZYG-9<sup>ch-TOG</sup> promotes the stability of acentrosomal poles via regulation of spindle microtubules in *C. elegans* oocyte meiosis**

Timothy J. Mullen<sup>†</sup>, Gabriel Cavin-Meza<sup>†</sup>, Ian D. Wolff, Emily R. Czajkowski, Nikita S. Divekar, Justin D. Finkle, and Sarah M. Wignall\*

Department of Molecular Biosciences, Northwestern University, Evanston, IL 60208

<sup>†</sup>These authors contributed equally to this work.

**\*To whom correspondence should be addressed:**

Sarah M. Wignall (nickname: Sadie)

Department of Molecular Biosciences

Northwestern University

2205 Tech Drive, Hogan 2-100

Evanston, IL 60208-3500

phone: 847-467-0386

fax: 847-491-4970

s-wignall@northwestern.edu

1 **ABSTRACT**

2           During mitosis, centrosomes serve as microtubule organizing centers that guide the  
3 formation of a bipolar spindle. However, oocytes of many species lack centrosomes; how  
4 meiotic spindles establish and maintain these acentrosomal poles remains poorly understood.  
5 Here, we show that the microtubule polymerase ZYG-9<sup>ch-TOG</sup> is required to maintain  
6 acentrosomal pole integrity in *C. elegans* oocyte meiosis; following acute depletion of ZYG-9  
7 from pre-formed spindles, the poles split apart and an unstable multipolar structure forms.  
8 Depletion of TAC-1, a protein known to interact with ZYG-9 in mitosis, caused loss of proper  
9 ZYG-9 localization and similar spindle phenotypes, further demonstrating that ZYG-9 is required  
10 for pole integrity. However, depletion of ZYG-9 surprisingly did not affect the assembly or  
11 stability of monopolar spindles, suggesting that ZYG-9 is not required for acentrosomal pole  
12 structure *per se*. Moreover, fluorescence recovery after photobleaching (FRAP) revealed that  
13 ZYG-9 turns over rapidly at acentrosomal poles, displaying similar turnover dynamics to tubulin  
14 itself, suggesting that ZYG-9 does not play a static structural role at poles. Together, these data  
15 support a global role for ZYG-9 in regulating the stability of bipolar spindles and demonstrate  
16 that the maintenance of acentrosomal poles requires factors beyond those acting to organize  
17 the pole structure itself.

## 18 **INTRODUCTION**

19           When a cell divides, the genetic material must be accurately partitioned to ensure the  
20 viability of the daughter cells. This process is mediated by a bipolar microtubule-based spindle  
21 that provides the forces to segregate the chromosomes. In mitotically-dividing cells, two  
22 centriole-containing centrosomes nucleate microtubules and organize their minus ends to form  
23 the spindle poles, thus providing structural cues that impart stability to the spindle. Conversely,  
24 meiotically-dividing oocytes of many organisms lack centrosomes and therefore use distinct  
25 mechanisms to focus microtubule minus ends and arrange the spindle poles. Notably,  
26 acentrosomal spindle poles in human oocytes are frequently unstable; a significant fraction of  
27 oocytes undergo a period of spindle instability in which, following bipolar spindle formation, the  
28 poles split apart and come back together multiple times. This instability has adverse  
29 consequences, as oocytes that display more pole instability have higher rates of chromosome  
30 mis-segregation (Holubcova et al., 2015). However, despite the importance of organizing and  
31 stabilizing acentrosomal poles, little is known about what factors promote pole stability in  
32 oocytes of any organism.

33           Here, we use *C. elegans* as a model to address the question of how acentrosomal  
34 oocyte spindles are stabilized. The spindle assembly pathway has been well documented in this  
35 system. Microtubules are first nucleated and the minus ends are sorted outwards away from the  
36 chromosomes. The minus ends then organize into multiple nascent poles that coalesce until  
37 bipolarity is achieved (Wolff et al., 2016; Gigant et al., 2017). Importantly, this pathway is similar  
38 to what has been described in human oocytes, where multiple poles also form and then  
39 coalesce to form a bipolar spindle (Holubcova et al., 2015). A number of factors required for  
40 acentrosomal spindle assembly and pole formation in *C. elegans* have been identified: MEI-  
41  $1/2^{\text{katanin}}$  promote the generation of short microtubules (Srayko et al., 2006), KLP-15/16<sup>Kinesin-14</sup>  
42 bundle these microtubules (Mullen and Wignall, 2017), KLP-18<sup>Kinesin-12</sup> and MESP-1 sort  
43 microtubules (Wolff et al., 2016; Wolff et al., 2021), ASPM-1 binds to microtubule minus ends

44 and functions to focus the spindle poles in conjunction with dynein (Connolly et al., 2014; Cavin-  
45 Meza et al., 2021), and KLP-7<sup>MCAK</sup> acts to limit the number of spindle poles and inhibit excess  
46 microtubule nucleation (Connolly et al., 2015; Han et al., 2015; Gigant et al., 2017). However,  
47 despite these proteins being well-studied in the context of spindle assembly, how the spindle is  
48 stabilized after it forms to maintain bipolarity is not well understood.

49 Now, we have gained insight into this question through studies of ZYG-9, a protein we  
50 have found to be required for the stability of acentrosomal spindles. In mitotically-dividing *C.*  
51 *elegans* embryos, ZYG-9 promotes the formation of long astral microtubules that aid in proper  
52 positioning of the mitotic spindle (Bellanger and Gonczy, 2003; Bellanger et al., 2007). In other  
53 organisms, ZYG-9 homologs (Stu2, Msps, XMAP215, ch-TOG) have also been shown to be  
54 essential for mitotic spindle assembly. In budding yeast, Stu2 is required for proper spindle  
55 positioning and orientation in addition to proper metaphase chromosome alignment (Kosco et  
56 al., 2001). In *Drosophila melanogaster*, depletion of Msps in S2 cells results in shorter mitotic  
57 spindles (Goshima et al., 2005). In *Xenopus laevis* egg extracts, depletion of XMAP215 results  
58 in abnormally short spindles or failure of centrosomes to nucleate microtubules (Tournebize et  
59 al., 2000). Finally, in human cells, ch-TOG is necessary for spindle pole integrity, as ch-TOG  
60 depletion results in multipolar mitotic spindles (Gergely et al., 2003; Cassimeris and Morabito,  
61 2004). Collectively, these phenotypes suggest that ZYG-9 family proteins regulate microtubule-  
62 based processes during cell division. This idea is also supported by *in vitro* experiments that  
63 demonstrate that ZYG-9-family proteins possess microtubule nucleation and polymerization  
64 activity (Brouhard et al., 2008; Widlund et al., 2011; Zanic et al., 2013; Thawani et al., 2018;  
65 Farmer et al., 2021).

66 In addition to this work on mitosis, prior studies have also implicated ZYG-9 family  
67 proteins as being essential for meiotic spindle assembly. Depletion of Msps results in multipolar  
68 spindles in *Drosophila* oocytes (Cullen and Ohkura, 2001). Moreover, in *C. elegans*, two early  
69 studies reported that spindles do not properly form following ZYG-9 depletion (Matthews et al.,

70 1998; Yang et al., 2003), and a recent paper demonstrated that ZYG-9 is required for spindle  
71 pole coalescence (Chuang et al., 2020). However, whether ZYG-9 is required to maintain  
72 acentrosomal spindle stability once the bipolar spindle forms has not yet been investigated.

73 To address this question, we optimized and employed a degron-based strategy,  
74 enabling us to rapidly remove ZYG-9 from pre-formed bipolar spindles. This approach revealed  
75 that ZYG-9 is required to maintain the integrity of acentrosomal spindle poles; following ZYG-9  
76 depletion the poles split apart and an unstable multipolar structure formed. Strikingly, this  
77 phenotype is similar to the unstable acentrosomal spindle poles described in human oocytes  
78 (Holubcova et al., 2015). However, despite its essential role in stabilizing bipolar spindles, we  
79 found that ZYG-9 depletion had no effect on monopolar spindle formation. This demonstrates  
80 that ZYG-9 is not required for pole integrity in all contexts; rather, the spindle destabilization  
81 seen following ZYG-9 depletion from pre-formed spindles likely arises from global effects on the  
82 spindle. Thus, our work has revealed new insight into mechanisms required for preserving  
83 meiotic spindle integrity and suggests that proper regulation of spindle microtubules is required  
84 to maintain the integrity of acentrosomal poles.

85 **RESULTS**

86

87 ***The XMAP215 homolog ZYG-9 is required for acentrosomal spindle pole coalescence***

88 We previously performed an RNAi screen in *C. elegans* by knocking down proteins and  
89 screening oocytes arrested in Metaphase I for spindle defects (Wignall and Villeneuve, 2009;  
90 Mullen and Wignall, 2017). One hit from this screen was ZYG-9, a homolog of the microtubule  
91 polymerase XMAP215/ch-TOG. In *C. elegans* mitosis, depletion of ZYG-9 causes spindle  
92 positioning defects in the one-cell stage embryo due to shortened astral microtubule arrays,  
93 demonstrating a role for ZYG-9 in regulation of microtubule dynamics (Bellanger and Gonczy,  
94 2003; Srayko et al., 2003). Moreover, depletion of ZYG-9 in oocytes has been reported to cause  
95 spindle defects (Matthews et al., 1998; Yang et al., 2003), but at the time we began our study, it  
96 was not known which stage of the acentrosomal spindle assembly pathway was affected.  
97 Therefore, to determine the cause of the metaphase defects, we depleted ZYG-9 using RNAi  
98 and filmed spindle assembly in oocytes expressing GFP::tubulin and mCherry::histone. In  
99 control oocytes, microtubules nucleate and then reorganize into an array with the minus ends  
100 oriented outwards; these ends subsequently form multiple poles that coalesce until bipolarity is  
101 achieved (Wolff et al., 2016). Following ZYG-9 depletion, microtubules nucleated and then the  
102 ends organized into multiple pole-like structures (Figure 1 – figure supplement 1A, Video 1);  
103 fixed imaging demonstrated that the microtubule minus end marker ASPM-1 and the spindle  
104 pole proteins MESP-1 and KLP-18 localized to these structures, confirming that they represent  
105 poles (Figure 1 – figure supplement 1B, 1C). However, the live imaging suggested that these  
106 poles were unstable, as we observed instances where multiple poles coalesced to form a  
107 transient bipolar-like spindle before splitting apart (Figure 1 – figure supplement 1A; Video 1).  
108 To quantify this phenotype we imaged single snapshots of intact worms, using oocyte position in  
109 the germ line as a proxy for meiotic progression. In *C. elegans*, oocytes are fertilized and then  
110 begin to form meiotic spindles as they pass through and exit the spermatheca into the “+1

111 position” of the germ line. Control embryos in the +1 position primarily contain either bipolar  
112 Meiosis I spindles (43%) or spindles that have progressed into Anaphase I (38%) and only 10%  
113 are still at the multipolar stage (Figure 1 – figure supplement 1D). In contrast, 50% of *zyg-*  
114 *9(RNAi)* embryos in the +1 position contained multipolar oocyte spindles while only 2%  
115 contained bipolar spindles, with the rest progressing to anaphase (Figure 1 – figure supplement  
116 1D). These findings suggest that ZYG-9 is required for stable pole coalescence during  
117 acentrosomal spindle assembly, confirming the findings of a recent study (Chuang et al., 2020).  
118

### 119 ***A degron-based approach to investigate ZYG-9***

120 The finding that acentrosomal poles transiently coalesce but then split apart following  
121 ZYG-9 depletion suggests that ZYG-9 may be required to maintain stable poles after they form.  
122 To test this hypothesis, we sought to rapidly deplete ZYG-9 from oocytes in which spindles had  
123 already established bipolarity. To this end, we took advantage of the auxin-inducible degron  
124 (AID) system (Zhang et al., 2015), using CRISPR to introduce a *degron::GFP* tag at the  
125 endogenous locus of *zyg-9* in a worm strain that expresses the TIR1 ubiquitin ligase from a  
126 germline-specific promoter (hereafter referred to as “ZYG-9 AID”; Figure 1A). This allows for  
127 proteasome-mediated degradation of *degron*-tagged ZYG-9 upon addition of the small molecule  
128 auxin.

129 To confirm that *degron::GFP::ZYG-9* retained its normal localization, we performed live  
130 imaging of oocytes and found that ZYG-9 begins to associate with microtubules at the multipolar  
131 stage, becoming enriched at the poles and increasing in intensity as the bipolar spindle forms  
132 (Figure 1 – figure supplement 2A, Figure 1B and Video 2), consistent with recent work (Chuang  
133 et al., 2020). Fixed imaging comparing the localization of *degron::GFP::ZYG-9* to the spindle  
134 pole protein ASPM-1 confirmed these findings (Figure 1C, Figure 1 – figure supplement 2B). To  
135 further validate this strain, we incubated worms on auxin-containing plates overnight to mimic  
136 the long-term depletion achieved by RNAi. Under these conditions, the spindles appeared

137 identical to those observed following *zyg-9(RNAi)*, as they exhibited multiple ASPM-1-labeled  
138 poles (Figure 1D). Moreover, examination of mitotic spindles in 1-cell stage embryos after auxin  
139 treatment revealed misoriented mitotic spindles with shorter astral microtubules (Figure 1E),  
140 which phenocopies the mitotic defects reported for RNAi-mediated depletion of ZYG-9  
141 (Bellanger and Gonczy, 2003; Srayko et al., 2003; Bellanger et al., 2007). Finally, we  
142 demonstrated that ZYG-9 was being depleted using both immunofluorescence (Figure 1D, 1E)  
143 and Western blotting (Figure 1 – figure supplement 3), confirming that our conditions could be  
144 used for efficient ZYG-9 depletion.

145

#### 146 ***ZYG-9 is required to maintain acentrosomal spindle pole integrity***

147 After validating our ZYG-9 AID strain using long-term depletion, we next attempted to  
148 acutely deplete ZYG-9 and assess the stability of oocyte spindle poles that had already formed.  
149 To this end, we arrested oocytes at Metaphase I through RNAi-mediated depletion of EMB-30, a  
150 component of the anaphase promoting complex (Furuta et al., 2000), in a strain containing both  
151 *degtron::GFP::ZYG-9* and *mCherry::tubulin*. We then dissected these arrested oocytes into  
152 auxin-containing media and immediately mounted them for live imaging. Upon acute auxin  
153 treatment, we observed a rapid loss in *GFP::ZYG-9* fluorescence, demonstrating that ZYG-9  
154 depletion was occurring. Strikingly, as ZYG-9 was being depleted, the spindle poles began to  
155 split apart and fragment (Figure 2A and Videos 3 and 4). In contrast, oocytes dissected into  
156 media without auxin maintained bipolarity over the entire time course (Figure 2A, Video 5).  
157 These findings demonstrate that ZYG-9 is required to maintain acentrosomal pole stability.

158 To confirm this result and to examine ZYG-9-depleted spindles at higher resolution, we  
159 performed a short-term auxin treatment, soaking whole worms in auxin and subsequently  
160 dissecting Metaphase I-arrested oocytes and fixing them for immunofluorescence. Protein  
161 depletion using this fixed imaging method is less rapid than in dissected oocytes (Divekar et al.,  
162 2021b); we found that we needed to incubate worms for 25-30 minutes in auxin prior to



163 dissection to begin to see spindle phenotypes. This is likely because auxin needs additional  
164 time to reach the oocytes when these cells are not dissected, resulting in increased incubation  
165 times and milder phenotypes. High resolution imaging of oocytes treated with auxin using this  
166 method revealed multiple pole defects, including unfocused spindle poles, microtubules  
167 emanating from the poles away from the chromosomes, and microtubules marked by ASPM-1  
168 that appeared to be dissociated from the pole (Figure 2B, 2C), confirming that ZYG-9 is required  
169 to maintain the integrity of spindle poles. In addition to pole defects, we observed a large  
170 proportion of spindles that had defects in microtubule organization in the middle region of the  
171 spindle (Figure 2B arrowheads, 2D). In control oocytes, microtubule bundles run alongside  
172 chromosomes forming lateral associations (Wignall and Villeneuve, 2009). Although these  
173 bundles are thought to be comprised of many short microtubules based on electron microscopy  
174 (Srayko et al., 2006; Redemann et al., 2018), at the resolution of light microscopy the bundles  
175 appear to run continuously across the center of the spindle (Figure 2B, top row). In contrast,  
176 following ZYG-9 depletion, microtubule bundles appeared to splay away from the chromosomes  
177 (Figure 2B) and spindles were also significantly shorter than controls (Figure 2E). We observed  
178 similar phenotypes in oocytes that were not metaphase-arrested (Figure 2C, 2D, Figure 2 –  
179 figure supplement 1), demonstrating that these phenotypes were not caused by the metaphase  
180 arrest. Finally, we observed some spindles that exhibited defects, even though ZYG-9 was still  
181 detectable by immunofluorescence (Figure 2B, second row), suggesting that ZYG-9 does not  
182 have to be fully depleted to disrupt spindle organization. Together, these data suggest that  
183 ZYG-9 is continuously required to maintain the integrity of the oocyte spindle and is especially  
184 important for the stability of acentrosomal poles.

185

### 186 ***The TACC homolog TAC-1 is required for proper ZYG-9 localization to the meiotic spindle***

187       Next, we sought to investigate how ZYG-9 is regulated in oocyte meiosis. During mitosis,  
188 ZYG-9 forms a complex with the transforming acidic coiled-coil (TACC) homolog TAC-1 and

189 these proteins are interdependent for localization to centrosomes (Bellanger and Gonczy, 2003;  
190 Srayko et al., 2003). To determine if TAC-1 also promotes the enrichment of ZYG-9 at  
191 acentrosomal poles, we imaged ZYG-9 localization in oocytes following *tac-1(RNAi)* (Figure 3A,  
192 3B). ZYG-9 enrichment was lost at the poles in a majority of oocyte spindles observed (Figure  
193 3C); we observed spindles where ZYG-9 was present on the spindle but no longer enriched at  
194 the poles (Figure 3A, row 2) as well as spindles where ZYG-9 localization was reduced overall  
195 (Figure 3A, rows 3-4). Moreover, there were spindle defects following *tac-1(RNAi)* that were  
196 similar to ZYG-9 depletion phenotypes, including fragmented poles with dispersed ASPM-1  
197 (Figure 3A, 3B, 3D), disruption of midspindle microtubules (Figure 3A, 3B, 3E), and the  
198 formation of multipolar spindles (Figure 3A, row 4).

199         Since we found that TAC-1 is required for robust ZYG-9 localization to the meiotic  
200 spindle and acentrosomal poles, we hypothesized that the *tac-1(RNAi)* phenotypes could be  
201 primarily explained by effects on ZYG-9. To test this, we performed short-term ZYG-9 AID  
202 depletion in worms treated with *tac-1(RNAi)*, reasoning that if the spindle phenotypes worsened  
203 then it would suggest that TAC-1 has functions beyond recruiting ZYG-9 to the spindle.  
204 However, after treating *tac-1(RNAi)* worms with auxin, oocyte spindles appeared  
205 morphologically similar to either *tac-1(RNAi)* or ZYG-9 AID alone (Figure 3B). ASPM-1 labeling  
206 indicated clear pole fragmentation, and splaying of midspindle microtubules, and the  
207 percentages of pole fragmentation and midspindle disruption between these three depletion  
208 conditions were nearly identical (Figure 3D, 3E). Together, these data support the hypothesis  
209 that TAC-1 is functioning to properly localize ZYG-9 to the meiotic spindle and enrich ZYG-9 at  
210 acentrosomal poles.

211         Since TAC-1 and ZYG-9 are interdependent for localization to centrosomes in mitosis  
212 (Bellanger and Gonczy, 2003; Srayko et al., 2003), we next sought to perform the reciprocal  
213 experiment and assess TAC-1 localization in oocytes following ZYG-9 depletion. To this end, we  
214 first generated and validated a TAC-1 antibody (Figure 4 – figure supplement 1) and used it to

215 assess TAC-1 localization throughout meiosis (Figure 4A). TAC-1 had no distinct localization on  
216 forming multipolar spindles, but once bipolarity was established, TAC-1 colocalized with ZYG-9  
217 at acentrosomal poles and this colocalization persisted throughout anaphase. However, when  
218 we performed short-term ZYG-9 depletion from Metaphase I-arrested oocytes, TAC-1  
219 localization to the spindle was lost (Figure 4B). These findings suggest that ZYG-9 and TAC-1  
220 are interdependent for localization to both centrosome-containing and acentrosomal spindle  
221 poles.

222

### 223 ***ZYG-9 is not required to form or stabilize spindle poles in all contexts***

224 Next, we sought to investigate how ZYG-9 promotes acentrosomal spindle stability.  
225 Since ZYG-9 localizes to spindle poles (Figure 1B, 1C, Figure 1 – figure supplement 2) and is  
226 required for both pole coalescence (Chuang et al., 2020) (Figure 1 – figure supplement 1,  
227 Figure 1D) and maintenance (Figure 2A-C, Figure 2 – figure supplement 1), one possibility is  
228 that a population of ZYG-9 at spindle poles functions to organize microtubule minus ends into a  
229 stable structure. However, since ZYG-9 depletion also causes microtubule bundles in the center  
230 of the spindle to splay (Figure 2B, 2D, Figure 2 – figure supplement 1) and decreases spindle  
231 length (Figure 2E), it is possible that the pole defects could instead be the result of a more  
232 global effect on spindle microtubules. For instance, if ZYG-9 depletion affects microtubules in  
233 the center of the spindle, disruption of this region could destabilize the entire structure and lead  
234 to pole splitting. Consistent with this second possibility, we observed a substantial population of  
235 ZYG-9 in the center of the spindle (Figure 1B). Notably, not all spindle pole components have  
236 this midspindle population, as the intensity of ASPM-1 fluorescence is much less prominent in  
237 this region (Figure 1C).

238 Consequently, to explore these possibilities we asked whether ZYG-9 depletion would  
239 affect the formation of monopolar spindles. These structures have a single pole and therefore  
240 lack the overlap region that is present at the center of bipolar spindles. Thus, if monopoles are

241 disrupted following ZYG-9 depletion, it would suggest that ZYG-9 has a structural role at poles,  
242 rather than the pole defects in bipolar spindles arising through disruption of the central overlap  
243 zone. To generate monopolar spindles, we depleted KLP-18<sup>kinesin-12</sup> via RNAi in the ZYG-9 AID  
244 strain; in oocytes lacking KLP-18, microtubule minus ends fail to be sorted outwards during  
245 spindle assembly and instead organize into a single ASPM-1-marked pole (Wignall and  
246 Villeneuve, 2009; Wolff et al., 2016). We then performed short-term ZYG-9 depletion by soaking  
247 *klp-18(RNAi)* worms in auxin, followed by immunofluorescence to assess oocyte spindle  
248 morphology. Importantly, monopolar spindles appeared normal following ZYG-9 depletion; there  
249 was a single, ASPM-1-marked pole and the volume of ASPM-1 at the pole was indistinguishable  
250 in the presence or absence of ZYG-9 (Figure 5A, 5B). As a complementary approach, we  
251 performed live imaging to visualize the effects of acute ZYG-9 removal from pre-formed  
252 monopolar spindles. Upon auxin treatment, we observed a rapid loss in *degron::GFP::ZYG-9*  
253 fluorescence but this depletion did not cause any noticeable effects on the stability or  
254 organization of the monopole; ZYG-9-depleted monopolar spindles maintained their aster-like  
255 structure, similar to control spindles where ZYG-9 was present (Figure 5C, Videos 6, 7). Thus,  
256 ZYG-9 is not required to maintain acentrosomal pole structure, and instead performs a function  
257 that is specifically required for the formation and stabilization of bipolar spindles. This result, in  
258 combination with the midspindle defects observed following ZYG-9 depletion (Figure 2B, 2D,  
259 Figure 2 – figure supplement 1), suggests that ZYG-9 does not solely function at acentrosomal  
260 spindle poles, and instead may promote pole stability through more global effects on spindle  
261 microtubules.

262

### 263 ***ZYG-9 is highly dynamic at acentrosomal spindle poles***

264 While centrosomes act as structural cues that organize mitotic spindle poles, it is not  
265 clear whether there are factors that stably associate with acentrosomal poles and perform this  
266 scaffolding role in *C. elegans* oocytes. Given that our data suggest that ZYG-9 stabilizes poles

267 through a global effect on spindle microtubules, we would not expect it to act as this type of  
268 static scaffold. However, since nothing is known about the dynamics of acentrosomal pole  
269 proteins in *C. elegans*, we set out to test this prediction directly.

270 A previous study assessed ZYG-9 dynamics at the poles of mitotic centrosome-  
271 containing spindles using fluorescence recovery after photobleaching (FRAP) (Woodruff et al.,  
272 2017). That investigation demonstrated that the exchange of ZYG-9 between the centrosome  
273 and cytoplasm was not highly dynamic, suggesting that it is a relatively stable component of  
274 centrosome-containing poles. To determine if this is also true at acentrosomal spindle poles, we  
275 performed an analogous experiment by photobleaching GFP::ZYG-9 and assessing its recovery  
276 at the poles of oocyte spindles compared to at centrosomes (Figure 6A, Figure 6 – figure  
277 supplement 1A). To assess the stability of ZYG-9 in mitosis we imaged centrosomes in the EMS  
278 (endomesodermal precursor) cell of 4-cell embryos since these cells remain stable at  
279 metaphase for a few minutes, allowing us to image fluorescence recovery (Decker et al., 2011;  
280 Woodruff et al., 2017). This experiment revealed that ZYG-9 turns over much more rapidly at  
281 acentrosomal spindle poles ( $t_{1/2} = 16.61s$ ) compared to centrosomes ( $t_{1/2} = 119.39s$ ) during  
282 metaphase (Figure 6A and Figure 6 – figure supplement 1A; Videos 8 and 9). Furthermore,  
283 ZYG-9 fluorescence at acentrosomal poles recovered to pre-bleach levels during the time  
284 course whereas ZYG-9 fluorescence at centrosomes did not. Strikingly, the rate of ZYG-9  
285 turnover at acentrosomal poles was so rapid that it was similar to the recovery of tubulin ( $t_{1/2} =$   
286  $14.61s$ ) (Figure 6B and Figure 6 – figure supplement 1B; Video 10). These results suggest that  
287 ZYG-9 is not a stable component of acentrosomal poles.

288 Following on these findings, we sought to investigate whether the faster ZYG-9 turnover  
289 in oocytes was the result of the inherent organization of acentrosomal poles, rather than  
290 reflecting a specific difference in ZYG-9 behavior; if this were the case, other pole components  
291 would also show the same discrepancy in dynamics compared to centrosomes. To test this, we  
292 performed FRAP analysis on ASPM-1, and found that this protein had relatively similar turnover

293 rates both in oocytes and in mitotically-dividing embryos ( $t_{1/2} = 49.48\text{s}$  and  $38.70\text{s}$ , respectively)  
294 and the fluorescence recovered to similar levels during the time of filming (Figure 6C and Figure  
295 6 – figure supplement 1C; Videos 11 and 12). Moreover, ASPM-1 recovered more slowly than  
296 ZYG-9 and tubulin (Figure 6A-C, Figure 6 – figure supplement 1), demonstrating that not all pole  
297 proteins display the rapid turnover seen for ZYG-9 at acentrosomal poles. Therefore, the rapid  
298 turnover of ZYG-9 in oocytes is not solely due to differences in pole organization in the absence  
299 of centrosomes. Rather, the faster ZYG-9 dynamics imply that ZYG-9 does not play a static,  
300 structural role at acentrosomal poles, and instead support the idea that ZYG-9 acts more  
301 globally to regulate spindle stability during oocyte meiosis.

302 **DISCUSSION**

303

304 ***ZYG-9 is required to stabilize and maintain acentrosomal poles during oocyte meiosis***

305       Taken together, our data support a model in which ZYG-9 provides spindle stability  
306 throughout meiosis (Figure 7). ZYG-9 begins to localize to the spindle as multiple poles are  
307 formed; these poles then merge, forming a stable bipolar structure. Without ZYG-9 present,  
308 nascent poles marked by ASPM-1 form, but can never stably coalesce. This finding was also  
309 recently published by another group, who depleted ZYG-9 in *C. elegans* oocytes using RNAi  
310 and reported similar depletion phenotypes as those seen with long-term ZYG-9 depletion in our  
311 degron system (Chuang et al., 2020). Our current study now extends these findings,  
312 demonstrating that ZYG-9 is also required to maintain spindle stability. We found that when  
313 ZYG-9 was removed from a pre-formed spindle, acentrosomal poles destabilize and the overlap  
314 zone of the spindle is disrupted, causing the spindle to become unstable and ultimately lose  
315 bipolarity. Thus, ZYG-9 is not only required for spindle assembly but is also continuously  
316 required to maintain spindle bipolarity.

317       Intriguingly, the observation that ZYG-9 depletion does not affect monopolar spindle pole  
318 structure demonstrates that the pole fragmentation phenotype does not occur in all contexts.  
319 This suggests that ZYG-9 is not required for pole formation *per se*, and instead regulates  
320 spindle stability more globally. We speculate that ZYG-9 could perform this function by  
321 regulating microtubule dynamics. The *Xenopus* homolog of ZYG-9, XMAP215, has been  
322 extensively characterized, and is known to be able to promote microtubule nucleation through  
323 an interaction with the  $\gamma$ -tubulin ring complex (Thawani et al., 2018). Moreover, XMAP215 has  
324 been demonstrated to have microtubule polymerase activity; this protein utilizes multiple TOG  
325 domains to bind tubulin dimers for incorporation into growing microtubule plus ends (Gard and  
326 Kirschner, 1987; Brouhard et al., 2008; Widlund et al., 2011; Ayaz et al., 2012). Additionally,  
327 recent work has demonstrated that XMAP215 can also promote microtubule catastrophe

328 (Farmer et al., 2021), implicating this protein in regulating multiple aspects of microtubule  
329 dynamics. In *C. elegans*, *in vitro* work with ZYG-9 has revealed that a minimal condensate  
330 comprised of ZYG-9, the microtubule associated protein TPXL-1, and the centrosomal protein  
331 SPD-5 can generate microtubule asters with sufficient tubulin concentrations (Woodruff et al.,  
332 2017). Finally, a role in regulating microtubule dynamics is consistent with the *in vivo*  
333 phenotypes of ZYG-9 depletion; astral microtubules are substantially shorter following ZYG-9  
334 depletion in mitotically-dividing embryos (Matthews et al., 1998; Bellanger and Gonczy, 2003;  
335 Srayko et al., 2003), and we demonstrated in this study that oocyte spindles shorten following  
336 ZYG-9 depletion, before they lose bipolarity. Altogether, this evidence makes it likely that ZYG-9  
337 regulates microtubule dynamics *in vivo*. One possibility is that ZYG-9, by acting as a  
338 microtubule polymerase, creates the appropriate microtubule substrate for sorting factors like  
339 KLP-18 and MESP-1. These factors sort bundles outwards where their ends can then be  
340 coalesced into stable poles; without ZYG-9 these proteins would therefore not be able to  
341 perform their proper functions, resulting in disruption of spindle organization. However, it is also  
342 possible that ZYG-9 facilitates microtubule nucleation and/or promotes catastrophe, as has  
343 been shown for XMAP215. Further investigation will be invaluable for evaluating how ZYG-9  
344 affects microtubule dynamics in *C. elegans* oocytes, to better understand the role of ZYG-9 in  
345 the maintenance of spindle stability.

346

#### 347 ***TAC-1 is essential for proper ZYG-9 localization to acentrosomal spindles***

348 In addition to gaining insight into the role of ZYG-9, we also demonstrated that ZYG-9  
349 and TAC-1 are interdependent for proper localization to the meiotic spindle, similar to what has  
350 been observed in *C. elegans* mitotically-dividing embryos (Bellanger and Gonczy, 2003; Srayko  
351 et al., 2003). Depletion of TAC-1 via RNAi leads to multiple phenotypes with varying degrees of  
352 acentrosomal pole instability, and concurrent depletion of ZYG-9 and TAC-1 does not  
353 exacerbate the spindle phenotypes when compared to ZYG-9 AID depletions alone. These data



354 suggest that TAC-1 functions to localize ZYG-9 to meiotic spindle poles, but it remains unclear  
355 how this interaction is regulated. In *Xenopus* egg extracts, the TACC homolog Maskin is  
356 phosphorylated by Eg2 (Aurora A kinase) and this phosphorylation regulates Maskin's  
357 localization and function (Peset et al., 2005). Related studies of mitotic *Drosophila* embryos  
358 have demonstrated that Aurora A stabilizes the interaction between TACC and XMAP215  
359 homologs (D-TACC and Msp, respectively) (Barros et al., 2005). The *C. elegans* Aurora A  
360 ortholog, AIR-1, is essential for spindle assembly and microtubule nucleation in oocytes  
361 (Sumiyoshi et al., 2015), raising the possibility that it could work in concert with ZYG-9.  
362 However, whether Aurora A regulates the interaction between TAC-1 and ZYG-9 in *C. elegans*  
363 oocytes remains to be investigated.

364         During mitosis, ZYG-9 and TAC-1 have also been shown to form a complex with another  
365 kinase, ZYG-8 (Bellanger et al., 2007). ZYG-8 mutants were shown to have similar mitotic  
366 defects as those seen with ZYG-9 and TAC-1 RNAi (Gonczy et al., 2001; Bellanger et al.,  
367 2007), but the function of ZYG-8 during oocyte meiosis has not been extensively characterized.  
368 A previous study observed defects in anaphase spindle elongation with removal of ZYG-8  
369 activity via a temperature-sensitive mutation, suggesting a decrease in microtubule  
370 polymerization (McNally et al., 2016), but no spindle assembly or stability phenotypes were  
371 noted prior to anaphase. It is possible that ZYG-8 is responsible for phosphorylating TAC-1 in *C.*  
372 *elegans* oocyte meiosis to stabilize the interaction between TAC-1 and ZYG-9, rather than  
373 Aurora A. If phosphorylation of TAC-1 by ZYG-8 stabilizes the interaction of TAC-1 and ZYG-9  
374 and their localization to the meiotic spindle, loss of ZYG-8 activity could lead to loss of ZYG-9  
375 polymerase activity, which could account for the reduced anaphase spindle elongation  
376 previously observed. More detailed observations of ZYG-8 localization and loss of ZYG-8  
377 activity prior to anaphase will help to determine if ZYG-8 is interacting with ZYG-9/TAC-1 and  
378 will clarify its role in oocyte meiosis.

379

380 ***Acentrosomal pole proteins have distinct and separate contributions to pole coalescence***  
381 ***and stability***

382 To date, the mechanisms of microtubule nucleation and polymerization during meiotic  
383acentrosomal spindle assembly in *C. elegans* are not well characterized. Recent work in this  
384system has implicated the nuclear lamina, the Ran GTPase gradient, and  $\gamma$ -tubulin in  
385microtubule nucleation (Chuang et al., 2020). Additionally, the work presented in both Chuang  
386*et al.* and this study supports a role for ZYG-9 in promoting microtubule polymerization and  
387suggests that proper regulation of microtubule dynamics may be essential for spindle pole  
388coalescence and for the maintenance ofacentrosomal spindle bipolarity. Building on these  
389findings, it will be important to define the exact hierarchal structure of proteins that act to  
390assemble the pole and then to coalesce and stabilize these structures. While localization of  
391numerous proteins toacentrosomal poles has been reported (reviewed in (Severson et al.,  
3922016; Mullen et al., 2019)), how each protein contributes to pole coalescence and maintenance  
393remains a crucial gap in knowledge.

394 Through FRAP ofacentrosomal spindle pole components, we have begun to tease apart  
395differences in the dynamics of pole proteins, providing some insight into their functions. Notably,  
396ZYG-9 recovered from bleaching in the same timeframe as tubulin itself, suggesting that ZYG-9  
397is extremely dynamic on theacentrosomal spindle. This is in contrast to another pole protein,  
398ASPM-1, which took longer to recover. ASPM-1 localization to meiotic spindle poles is robust  
399and difficult to disrupt; this protein is often used as a marker for poles following depletions of  
400various other spindle proteins. Additionally, ASPM-1 has been shown to be required for  
401localizing other pole proteins, such as LIN-5 and dynein (van der Voet et al., 2009). The slower  
402turnover for ASPM-1 raises the possibility that it could be crucial for building an initial pole  
403structure, on which other pole proteins can act upon to drive coalescence and stability. Notably,  
404pole splaying has been observed following RNAi of ASPM-1 or dynein/dynactin (Yang et al.,  
4052005; Ellefson and McNally, 2009; van der Voet et al., 2009; Ellefson and McNally, 2011;

406 Crowder et al., 2015; Muscat et al., 2015), supporting a role for these proteins in pole  
407 organization.

408         In a recent study, we used the degron system to investigate dynein, and found that, like  
409 ZYG-9, dynein is required for both pole organization and stability (Cavin-Meza et al., 2021).  
410 However, the phenotype of dynein depletion was markedly different from what we report for  
411 ZYG-9 depletion in the current study; while acute dynein depletion caused focused poles to  
412 splay, the center of the spindle remained intact and therefore the spindles were able to maintain  
413 bipolarity. Moreover, when we depleted dynein from monopolar spindles, the entire monopole  
414 came apart, dispersing microtubule bundles into the cytoplasm. These findings suggest that in  
415 contrast to ZYG-9, dynein plays a specific role at the pole itself, acting to organize microtubule  
416 minus ends into a stable pole structure. In contrast, our findings with ZYG-9 and TAC-1 suggest  
417 that ZYG-9 has a distinct, broader function in meiotic spindles that is not restricted to keeping  
418 acentrosomal poles focused and stable.

419         In summary, our degron-based experiments have provided new insight into the role of  
420 ZYG-9 in stabilizing the acentrosomal spindle and suggest that proper regulation of microtubule  
421 dynamics is essential to maintain spindle pole integrity. Applying degron-based approaches to  
422 other pole proteins and comparing the depletion phenotypes on bipolar and monopolar spindles,  
423 will help elucidate the contributions of other pole components to spindle assembly and/or  
424 maintenance. Intriguingly, the spindle instability observed in our live imaging of acute ZYG-9  
425 depletion is reminiscent of the instability that has been observed in human oocytes (Holubcova  
426 et al., 2015). Loss of bipolarity, as seen following ZYG-9 depletion, would lead to abnormal  
427 segregation of chromosomes into multiple masses; this is similar to the correlation between  
428 spindle instability and chromosome segregation errors seen in human oocytes (Holubcova et  
429 al., 2015). Therefore, it would be exciting for future studies to investigate whether misregulation  
430 of microtubule dynamics could contribute to the spindle instability seen in human oocytes.

431 **MATERIALS AND METHODS**

432

433 **Strains**

434 EU1067: *unc-119(ed3) ruls32 [unc-119(+) pie-1::GFP::H2B] III; ruls57 [unc-119(+) pie-*  
435 *1::GFP::tubulin]* (gift from Bruce Bowerman)

436 OD56: *ItIs37 [(pAA64) pie-1::mCherry::his-58 + unc-119(+)] IV* (gift from Arshad Desai)

437 OD57: *unc-119(ed3) III; ItIs37 [pAA64; pie-1::mCherry::his-58; unc-119(+)] IV; ItIs25 [pAZ132;*  
438 *pie-1::GFP::tba-2; unc-119 (+)]* (gift from Arshad Desai)

439 EU2876: *or1935 [GFP::aspm-1] I; ItIs37 [pAA64; pie-1::mCherry::his-58; unc-119(+)] IV*

440 CA1199: *unc-119(ed3); ieSi38 [Psun-1::TIR1::mRuby::sun-1 3'UTR, cb-unc-119(+)] IV* (gift from  
441 Abby Dernburg)

442 JA1559: *wels21 [pJA138 (pie-1::mCherry::tub::pie-1)]; unc-119(ed3) III* (gift from Mike Glotzer)

443 SMW21: CA1199 x OD56; *unc-119(ed3); ieSi38 [Psun-1::TIR1::mRuby::sun-1 3'UTR, cb-unc-*  
444 *119(+)] IV; ItIs37 [(pAA64) pie-1::mCherry::his-58 + unc-119(+)] IV*

445 SMW22: CA1199 x JA1559; *unc-119(ed3); ieSi38 [Psun-1::TIR1::mRuby::sun-1 3'UTR, cb-unc-*  
446 *119(+)] IV; wels21 [pJA138 (pie-1::mCherry::tub::pie-1)]; unc-119(ed3) III*

447 SMW24: *Pzyg-9::degron::EmGFP::zyg-9 (C6->T—PAM site mutation) II; unc-119(ed3); ieSi38*  
448 *[Psun-1::TIR1::mRuby::sun-1 3'UTR, cb-unc-119(+)] IV*

449 SMW26: SMW24 x SMW21; *Pzyg-9::degron::EmGFP::zyg-9 (C6->T—PAM site mutation) II;*  
450 *unc-119(ed3); ieSi38 [Psun-1::TIR1::mRuby::sun-1 3'UTR, cb-unc-119(+)] IV; ItIs37 [(pAA64)*  
451 *pie-1::mCherry::his-58 + unc-119(+)] IV*

452 SMW33: SMW24 x SMW22; *Pzyg-9::degron::EmGFP::zyg-9 (C6->T—PAM site mutation) II;*  
453 *unc-119(ed3); ieSi38 [Psun-1::TIR1::mRuby::sun-1 3'UTR, cb-unc-119(+)] IV; wels21 [pJA138*  
454 *(pie-1::mCherry::tub::pie-1)]; unc-119(ed3) III*

455

456 **Generation of *degron::EmGFP::ZYG-9* strain (SMW24)**

457 A CRISPR-based approach (Arribere et al., 2014; Paix et al., 2015) was used to  
458 generate an endogenously tagged *degron::EmGFP::ZYG-9* (SMW24). Briefly, 27 $\mu$ M  
459 recombinant Alt-R *S. pyogenes* Cas9 protein (IDT) was co-injected with 13.6 $\mu$ M tracrRNA (IDT),  
460 4 $\mu$ M *dpy-10* crRNA, 1.34 $\mu$ M *dpy-10* repair oligo, 9.6 $\mu$ M *zyg-9* crRNA, and 136ng/ $\mu$ L ssDNA *zyg-*  
461 *9* repair template into CA1199 (*Psun-1::TIR1::mRuby*) worms, that were then allowed to  
462 produce progeny (See Table 1 for list of tracrRNA, crRNA, and primers used). Worms from  
463 plates containing rollers and dumpys were screened for *degron::GFP* insertions by PCR  
464 screening. To make the *zyg-9* repair template, we generated an N-terminal  
465 *degron::EmGFP::linker* (pADR28) using site directed mutagenesis and pLZ29 (gift from Abby  
466 Dernburg). The linker we inserted is from pIC26. The tag was then amplified using PCR with  
467 primers that contained homology to the *zyg-9* locus with the final product containing 57 bp of  
468 homology upstream of the *zyg-9* start codon and 61 bp of homology downstream of the start  
469 codon. ssDNA was generated by asymmetric PCR. SMW24 (*degron::EmGFP::ZYG-9*) was  
470 crossed with SMW21 (*mCherry::histone; TIR1::mRuby*) to generate SMW26: *Pzyg-9-*  
471 *16::degron::EmGFP::ZYG-9 (C6->T—PAM site mutation) II; ieSi38 [Psun-1::TIR1::mRuby::sun-*  
472 *1 3'UTR, cb-unc-119(+)] IVtIs37 [(pAA64) pie-1::mCherry::his-58 + unc-119(+)] IV*. SMW24  
473 was also crossed with SMW22 to generate SMW33: *Pzyg-9::degron::EmGFP::zyg-9 (C6->T—*  
474 *PAM site mutation) II; unc-119(ed3); ieSi38 [Psun-1::TIR1::mRuby::sun-1 3'UTR, cb-unc-119(+)]*  
475 *IV; wels21 [pJA138 (Ppie-1::mCherry::tub::pie-1 3'UTR)]; unc-119(ed3) III*.

**Table 1 – CRISPR/Cas9 Information**

|                                                   |                                                                                                                        |
|---------------------------------------------------|------------------------------------------------------------------------------------------------------------------------|
| Alt-R CRISPR-Cas9<br>tracrRNA                     | Proprietary from IDT                                                                                                   |
| <i>dpy-10</i> crRNA                               | 5'-GCUACCAUAGGCACCACGAG-3'                                                                                             |
| <i>dpy-10</i> repair oligo<br>(Ultramer from IDT) | 5'-CACTTGA ACTTCAATACGGCAAGATGAGAAT<br>GACTGGAAACCGTACCGCATGCGGTGCCTATG<br>GTAGCGGAGCTTCACATGGCTTCAGACCAACAGCCTAT-3'   |
| <i>zyg-9</i> crRNA                                | 5'-CUCGUCCAGAUAAUCCCAAU-3'                                                                                             |
| <i>zyg-9</i> repair-F1                            | 5'-ACGTAGTAAACTGTCATTTTTTCAGATAATGCCTAAA<br>GATCCAGCCAAACC-3'                                                          |
| <i>zyg-9</i> repair-R1                            | 5'-CCACCTCGTCCAGATAATCCCAATTAGACATTCTAG<br>AGCGGCCGCCA-3'                                                              |
| <i>zyg-9</i> repair-F2                            | 5'-TTCGTTTCGCTTTCTTTGTTTATTGCAAGGCACGTA<br>GTAAACTGTCATTTTTTCAG-3'                                                     |
| <i>zyg-9</i> repair-R2                            | 5'-CGAAGTTCGGTGGAAAGTTTGGGAAGGATATCCACC<br>TCGTCCAGATAATC-3'                                                           |
| <i>zyg-9</i> insertion check-F                    | 5'-CGGAAATCTATTGTTGAAATCTCCTTTC-3'                                                                                     |
| <i>zyg-9</i> insertion check-R                    | 5'-CTTTCATTTTTTCGAAAATGACGGG-3'                                                                                        |
| pADR28                                            | degron::EmGFP::linker plasmid template for PCR reactions to generate <i>zyg-9</i> repair template. Derived from pLZ29. |

## 476 **RNAi**

477 RNAi was performed as in (Davis-Roca et al., 2018). Briefly, from a feeding library  
478 (Fraser et al., 2000; Kamath et al., 2003), individual RNAi clones were picked and grown  
479 overnight at 37°C in LB with 100µg/ml ampicillin. Overnight cultures were spun down and plated  
480 on NGM (nematode growth media) plates containing 100µg/ml ampicillin and 1mM IPTG. Plates  
481 were dried overnight. Worm strains were synchronized by bleaching gravid adults and letting the  
482 eggs hatch overnight without food. L1s were then plated on RNAi plates and grown to adulthood  
483 at 15°C for 5–6 days.

484

## 485 **Immunofluorescence and antibodies**

486 Immunofluorescence was performed by dissecting worms into M9 or Meiosis Media (0.5  
487 mg/mL Inulin from dahlia tubers (CAS Number 9005-80-5), 25 mM HEPES, pH 7.5, 60%  
488 Leibovitz's L-15 Media (Gibco 11415-049), 20% Heat-inactivated Fetal Bovine Serum (Laband  
489 et al., 2018)), freeze cracking embryos, and plunging into -20°C methanol. Embryos were fixed  
490 for 35–45 minutes, rehydrated in PBS, and blocked in AbDil (PBS plus 4% BSA, 0.1% Triton X-  
491 100, 0.02% Na-Azide) for 30 minutes. Primary antibodies were incubated overnight at 4°C. The  
492 next day, embryos were washed 3x with PBST (PBS plus 0.1% Triton X-100), incubated in  
493 secondary antibody for 1 hour and 15 minutes, washed again as before, incubated in mouse  
494 anti- $\alpha$ -tubulin-FITC for 1.5 hours, washed again, and incubated in Hoechst (1:1000 in PBST) for  
495 15 minutes. Embryos were then washed 2x with PBST, mounted in 0.5% p-phenylenediamine,  
496 20mM Tris-Cl, pH 8.8, 90% glycerol, and sealed with nail polish; except for the overnight  
497 primary, the entire procedure was performed at room temperature. For experiments with  
498 staining of GFP::ZYG-9 (SMW24) with mouse anti-GFP, embryos were blocked in AbDil  
499 overnight at 4°C and incubated in primary antibody for 2 hours at room temperature. Primary  
500 antibodies used in this study: rabbit anti-ASPM-1 (1:5000, gift from Arshad Desai) (Wignall and  
501 Villeneuve, 2009), rat anti-KLP-18 (1:500, gift from Olaf Bossinger) (Segbert et al., 2003), rabbit

502 anti-MESP-1 (1:3000) (Wolff et al., 2016), mouse anti-GFP (1:200; Invitrogen). Directly  
503 conjugated mouse anti- $\alpha$ -tubulin-FITC (DM1 $\alpha$ , Sigma) and Alexa-fluor directly conjugated  
504 secondary antibodies (Invitrogen) were used at 1:500. All antibodies were diluted in AbDil.

505

### 506 **Generation of TAC-1 antibody**

507       Based on previous predictions of TAC-1 domains and structure (Bellanger and Gonczy,  
508 2003), we selected a 15aa sequence (PFNGSQNGHPENEEP) from the N-terminus of TAC-1;  
509 this region was chosen for relatively accessible residues as an epitope and due to this region's  
510 lack of predicted interaction with other proteins. A rabbit polyclonal antibody was produced  
511 against this peptide sequence by ProteinTech, and the final antibody was affinity purified using  
512 a Sulfolink Immobilization Kit to generate the column. This antibody was validated for proper  
513 localization via IF imaging in both *control(RNAi)* and *tac-1(RNAi)* conditions. Due to relatively  
514 high background staining, this antibody was preabsorbed prior to use in immunofluorescence  
515 imaging. To preabsorb, ~100 worms (from the same background strain as the experimental  
516 slides) were grown under *tac-1(RNAi)* conditions. These worms were dissected at adulthood  
517 and subjected to our standard fixation methods. After blocking, these worms were incubated  
518 with TAC-1 antibody (1:50 diluted in AbDil) and left overnight at 4°C. The following day, the  
519 TAC-1 solution was removed and stored for 24-48 hours at 4°C prior to being used in another  
520 set of IF slides containing the experimental conditions.

521

### 522 **Microscopy**

523       All fixed imaging was performed on a DeltaVision Core deconvolution microscope with a  
524 100x objective (NA = 1.4) (Applied Precision). This microscope is housed in the Northwestern  
525 University Biological Imaging Facility supported by the NU Office for Research. Image stacks  
526 were obtained at 0.2 $\mu$ m z-steps and deconvolved using SoftWoRx (Applied Precision). All



527 images in this study were deconvolved and displayed as full maximum intensity projections of  
528 data stacks encompassing the entire spindle structure, unless stated otherwise.

529

### 530 **Time-lapse Imaging**

531 Two-color live imaging was performed using a spinning disk confocal microscope with a  
532 63x HC PL APO 1.40 NA objective lens. A spinning disk confocal unit (CSU-X1; Yokogawa  
533 Electric Corporation) attached to an inverted microscope (Leica DMI6000 SD) and a Spectral  
534 Applied Imaging laser merge ILE3030 and a back-thinned electron-multiplying charge-coupled  
535 device (EMCCD) camera (Photometrics Evolve 521 Delta) were used for image acquisition. The  
536 microscope and attached devices were controlled using Metamorph Image Series Environment  
537 software (Molecular Devices). For the acquisitions, 7 z-stacks at 2 $\mu$ m increments were taken  
538 every 30 seconds at room temperature. Images were processed using ImageJ. Images are  
539 shown as maximum intensity projections of the entire spindle structure. Live, intact worms were  
540 mounted on a homemade slide holder on 4% agarose in M9 pads that were made on Bob  
541 Dylan's "A Shot of Love" vinyl LP (CBS) to make grooves for immobilizing worms (Rivera  
542 Gomez and Schvarzstein, 2018). The worms were picked into a drop of M9, 20 $\mu$ M serotonin  
543 creatinine sulfate monohydrate (Sigma), 2% tricaine, and 0.4% tetramisole and covered with a  
544 coverslip. The spinning disk microscope is housed in the Northwestern University Biological  
545 Imaging Facility supported by the NU Office for Research.

546

### 547 **Auxin Treatment**

548 For long-term auxin treatment, worms were transferred onto NGM plates containing  
549 1mM auxin (indol-3-acetic acid, Alfa Aesar) seeded with OP-50, incubated overnight, and then  
550 processed for immunofluorescence as described above.

551 For short-term auxin treatment for fixed imaging, whole worms were picked into a drop of  
552 L-15 blastomere media (0.5 mg/mL Inulin from dahlia tubers (CAS Number 9005-80-5), 25 mM

553 HEPES, pH 7.5, 60% Leibovitz's L-15 Media (Gibco 11415-049), 20% Heat-inactivated Fetal  
554 Bovine Serum) with 1mM auxin (indol-3-acetic acid, Alfa Aesar) and incubated for 25-30  
555 minutes in a humidity chamber before dissection and freeze cracking. For vehicle treatment,  
556 0.25% ethanol in L-15 blastomere media was used. The rest of the protocol is the same as the  
557 immunofluorescence procedure described above.

558 For acute auxin treatment of oocytes for live imaging, worms were picked into a drop of  
559 Meiosis media (described in the immunofluorescence section) containing either 100  $\mu$ M auxin or  
560 vehicle (ethanol). The worms were quickly dissected to allow oocytes to enter the media,  
561 covered with a coverslip, sealed with Vaseline, and immediately imaged at room temperature  
562 using the spinning disk confocal described above. For more details on auxin protocols, see  
563 (Divekar et al., 2021a; Divekar et al., 2021b).

564

### 565 **Western Blotting**

566 300 whole adult worms (per sample) were grown on control (empty vector) RNAi plates and  
567 treated in a manner identical to the auxin protocols utilized in this paper (30 minutes in auxin  
568 solution for short-term AID, 240 minutes on auxin plates for long-term AID). Worms were  
569 subsequently bleached to remove worm bodies and harvest embryos, and these samples were  
570 spun down (800 rcf for 1 minute), rinsed in M9 and spun down again, and then M9 was removed  
571 to leave only clean embryos. The pellet was then mixed with SDS lysis buffer, boiled for 10  
572 minutes (using a heat block at 95°C), and run on a 4-20% gradient Tris-Glycine gel (BioRad  
573 Mini-PROTEAN TGX) at 80V for ~1.5 hours. Protein was transferred onto nitrocellulose via a  
574 BioRad Trans-blot Turbo apparatus (semi-dry in a 10% MeOH, 25mM Tris, 192mM glycine  
575 transfer buffer) at 25V for 30 minutes. Blot was placed on rocker and blocked in 5% milk in  
576 TBS/0.1% Tween overnight at 4°C, separated into two pieces, and then incubated with indicated  
577 primary antibodies overnight at 4°C (1:1000 mouse anti-degron or 1:5000 mouse anti-tubulin).  
578 The entire blot was then washed with TBS/0.1% Tween, treated with anti-mouse HRP (1:5000)

579 for 1.5 hours at RT, washed again, incubated for 4 minutes in BioRad Clarity ECL solution, and  
580 then exposed for 5 minutes.

581

## 582 **FRAP**

583 FRAP experiments were performed on the same spinning disk confocal microscope  
584 mentioned above using a 63x HC PL APO 1.40 NA oil immersion objective. Photobleaching was  
585 performed with a 405 nm laser (5.5 mW-11.0 mW output). Poles were bleached using 5  
586 repetitions of 100ms and images were taken at 5-10s intervals. Analysis of the recovery curves  
587 and the half-time recovery were carried out with FIJI to obtain raw fluorescence data and the  
588 curves were fit using a custom Python script (<https://github.com/justinfinkle/mullen-frap>). For all  
589 FRAP acquisitions except ASPM-1 meiotic spindles, oocytes and embryos were mounted as  
590 previously described (Laband et al., 2018). Briefly, oocytes and embryos were dissected into a  
591 drop of Meiosis media (0.5 mg/mL Inulin from dahlia tubers (CAS Number 9005-80-5), 25 mM  
592 HEPES, pH 7.5, 60% Leibovitz's L-15 Media (Gibco 11415-049), 20% Heat-inactivated Fetal  
593 Bovine Serum) and mounted in a homemade slide mount. Bleaching of the mitotic centrosomes  
594 was done in the EMS cell in the 4-cell embryo, and MI and MII meiotic spindles were bleached  
595 for the acentrosomal spindle pole FRAP experiments. For ASPM-1 meiotic spindle FRAP  
596 experiments live, intact worms were mounted on 3-5% agarose, M9 pads in 50% live imaging  
597 solution (modified S-basal [50mM KH<sub>2</sub>PO<sub>4</sub>, 10mM K-citrate, 0.1M NaCl, 0.025mg/ml  
598 cholesterol, 3mM MgSO<sub>4</sub>, 3mM CaCl<sub>2</sub>, 40mM serotonin creatinine sulfate monohydrate]), 50%  
599 0.1 micron polystyrene Microspheres (Polysciences Inc.), and covered with a coverslip. Only  
600 data from bleached spindles that progressed to anaphase were included in our analysis.

601

## 602 **Data Analysis and Quantification**

603 **Figure 1B:** Oocytes were imaged using the same set-up as described for the FRAP analysis. A  
604 10 pixel wide x 12 $\mu$ m line profile analysis was performed in ImageJ on max projected images of  
605 10 different metaphase spindles after background subtraction.

606 **Figure 1C:** IF images of oocyte spindles were used for linescan measurements of ASPM-1 and  
607 ZYG-9 channels. A 3 x 12 $\mu$ m line profile analysis was performed in ImageJ on max projected  
608 images of 23 different metaphase spindles after background subtraction.

609 **Figure 1D:** IF images of oocyte spindles stained for DNA, tubulin, ASPM-1, and ZYG-9 were  
610 scored as bipolar if ASPM-1 was enriched at the two poles, or multipolar/collapsed if ASPM-1  
611 localized to multiple foci or was diffuse throughout the spindle. In oocytes from worms not  
612 treated with auxin, 1/34 spindles from 2 biological replicates were multipolar. In oocytes from  
613 worms plated on auxin-containing plates for 24 hours, 44/45 spindles from 2 biological  
614 replicates were multipolar or collapsed.

615 **Figure 1E:** IF images of 1-cell stage embryos were stained for DNA, tubulin, ASPM-1, and  
616 ZYG-9 were scored as aligned if the spindle was oriented parallel to the long axis of the embryo,  
617 or misaligned if the spindle was oriented perpendicular to this axis. In zygotes from worms not  
618 treated with auxin, 4/4 spindles from 2 biological replicates were aligned. In zygotes from worms  
619 plated on auxin-containing plates for 24 hours, 8/8 spindles from 2 biological replicates were  
620 misaligned.

621 **Figure 1 – figure supplement 1A:** 1A shows a representative movie of the *zyg-9(RNAi)*  
622 phenotype; we observed this phenotype in 3/3 movies, and a similar phenotype was reported in  
623 (Chuang et al., 2020).

624 **Figure 1 – figure supplement 1B:** ASPM-1 is enriched at spindle poles in control oocyte  
625 spindles (van der Voet et al., 2009). Following ZYG-9 depletion, ASPM-1 localized to multiple  
626 foci in 14/14 spindles, as shown in the representative image.

627 **Figure 1 – figure supplement 1C:** KLP-18 and MESP-1 are enriched at spindle poles in control  
628 oocyte spindles (Segbert et al., 2003; Wolff et al., 2016). Following ZYG-9 depletion, KLP-18  
629 and MESP-1 co-localized at multiple foci in 18/18 spindles, as shown in the representative  
630 image.

631 **Figure 1 – figure supplement 1D:** Live, intact worms expressing GFP::*tubulin*, GFP::*histone*  
632 (EU1067) fed either *control(RNAi)* or *zyg-9(RNAi)*-expressing bacteria were anesthetized in  
633 0.2% tricaine, 0.02% levamisole in M9 and viewed on a Leica DM5500B widefield fluorescence  
634 microscope. Spindles in embryos in the -1, spermatheca, and +1 positions within the gonad  
635 were scored for microtubule organization by eye. A spindle was scored as: "cage" if microtubule  
636 bundles could be clearly seen after the haze of histone::*GFP* in the nucleus had disappeared,  
637 which indicates that the nuclear envelope had broken down; "multipolar" if it had prominent  
638 microtubule bundles that formed more than two organized poles; "collapsed" if the microtubule  
639 structure had collapsed around the chromosomes and lacked prominent bundles and organized  
640 poles; "bipolar" if there were two organized spindle poles; "anaphase" if there were two or more  
641 sets of segregated chromosomes. Control -1 (n=30): 36% cage (11/30), 13% NEBD No MTs  
642 (4/30), 43% multipolar (13/30), 3% bipolar (1/30), 3% collapsed (1/30). Control spermatheca  
643 (n=30): 87% multipolar (26/30), 13% bipolar (4/30). Control +1 (n=94): 10% multipolar (9/94),  
644 43% bipolar (40/94), 9% collapsed (8/94), 38% anaphase (36/94). *zyg-9(RNAi)* -1 (n=34) 32%  
645 cage (11/34), 44% NEBD No MTs (15/34), 24% multipolar (8/34). *zyg-9(RNAi)* spermatheca  
646 (n=25): 92% multipolar (23/25), 4% bipolar (1/25), 4% collapsed (1/25); *zyg-9(RNAi)* +1  
647 (n=191): 50% multipolar (96/191), 2% bipolar (4/191), 25% collapsed (48/191), 22.5% anaphase  
648 (43/191).

649 **Figure 1 – figure supplement 2:** For panel B, we captured multiple images of each stage,  
650 which all showed the localization pattern displayed in the representative images. The number of  
651 images captured were: 6 Pre-NEBD, 11 Cage/Multipolar, 9 Multipolar, 41 Bipolar, 16 Early  
652 anaphase, and 14 Late anaphase.

653 **Figure 2C:** Pole phenotypes were quantified by eye in unarrested (*control(RNAi)*) and  
654 Metaphase I-arrested (*emb-30(RNAi)*) oocytes in the presence of either vehicle or 1 mM auxin.  
655 Spindle poles were scored as fragmented if there were clear defects in spindle pole organization  
656 including excess tubulin and ASPM-1 signal in the area near the spindle poles and splaying or  
657 fragmentation of the tubulin and ASPM-1 signal at the poles. In unarrested conditions without  
658 auxin, 99/106 (93.4%) poles were focused while 7/106 (6.6%) were fragmented. With addition of  
659 auxin, we observed 13/79 (16.5%) poles were focused while 66/79 (83.5%) were fragmented.  
660 For metaphase-arrested conditions without auxin, 81/86 (94.2%) poles were focused while 5/86  
661 (5.8%) were fragmented. With addition of auxin, we observed 27/90 (30%) poles were focused  
662 while 63/90 (70%) were fragmented.

663 **Figure 2D:** Midspindle phenotypes were quantified by eye in unarrested (*control(RNAi)*) and  
664 Metaphase-I arrested (*emb-30(RNAi)*) oocytes in the presence of either vehicle or 1 mM auxin.  
665 Midspindle microtubule splaying was determined by observing microtubule bundles near  
666 chromosomes. If microtubules could be seen splaying outwards into the cytoplasm, with no  
667 clear connection to another microtubule bundle or to the chromosomes, that spindle was  
668 considered splayed. . In unarrested conditions without auxin, 100/106 (94.3%) midzones were  
669 bundled while 6/106 (5.7%) were splayed. With addition of auxin, we observed 21/79 (26.6%)  
670 midzones were bundled while 58/79 (73.4%) were splayed. For metaphase-arrested conditions  
671 without auxin, 85/86 (98.8%) midzones were bundled while 1/86 (1.2%) were splayed. With  
672 addition of auxin, we observed 43/90 (47.8%) midzones were bundled while 47/90 (52.2%) were  
673 splayed.

674 **Figure 2E:** Imaris 3D Imaging Software (Bitplane) was used for spindle length measurements  
675 (procedure modified from (Davis-Roca et al., 2017; Heath and Wignall, 2019)). To calculate  
676 spindle length, the “Surfaces” tool was first used to determine the volume of each pole stained  
677 with ASPM-1 and then to assign the center of the volume for each pole. The distance between  
678 these two center points was then measured as the spindle length.

679 **Figure 3C:** Oocyte spindles were quantified using the FIJI plugin Coloc2 to determine the  
680 Pearson coefficient between the ZYG-9 and ASPM-1 channels. All r values were placed into  
681 boxplots using Rstudio (boxes represent first quartile, median, and third quartile); the mean  
682 values of the Pearson coefficient in *control(RNAi)* and *tac-1(RNAi)* conditions were compared  
683 against each other using a two-tailed t-test. Images for each condition were collected from at  
684 least three biological replicates, and the number of images for each condition was listed above  
685 the boxplots.

686 **Figure 3D:** Oocyte spindles were quantified by eye as described for Figure 2C. Exact  
687 percentages for *control(RNAi)* were 95.1% (78/82) focused, 4.9% (4/82) fragmented (No Auxin),  
688 and 18.1% (17/94) focused, 81.9% (77/94) fragmented (With Auxin). Exact percentages for *tac-*  
689 *1(RNAi)* were 13.9% (5/36) focused, 86.1% (31/36) fragmented (No Auxin) and 11.1% (3/27)  
690 focused, 88.9% (24/27) fragmented (With Auxin). Images for each condition were collected from  
691 at least three biological replicates.

692 **Figure 3E:** Oocyte spindles were quantified by eye as described for Figure 2D. Exact  
693 percentages for *control(RNAi)* were 91.4% (75/82) bundled, 8.6% (7/82) splayed (No Auxin) and  
694 22.3% (21/94) bundled, 77.7% (73/94) splayed (With Auxin). Exact percentages for *tac-1(RNAi)*  
695 were 38.9% (14/36) bundled, 61.1% (22/36) splayed (No Auxin) and 29.6% (8/27) bundled,  
696 70.4% (19/27) splayed (With Auxin). Images for each condition were collected from at least  
697 three biological replicates.

698 **Figure 4 – figure supplement 1:** Verification of antibody staining was done by comparing  
699 *control(RNAi)* and *tac-1(RNAi)* worms. Localization of TAC-1 and ZYG-9 to centrosomes was  
700 consistent across 5/5 *control(RNAi)* embryos and loss of TAC-1 and ZYG-9 at centrosomes was  
701 observed in 5/5 *tac-1(RNAi)* embryos.

702 **Figure 5B:** The volume of the spindle pole was determined using ASPM-1 staining as described  
703 in (Hollis et al., 2020). Briefly, Imaris 3D Imaging Software (Bitplane) was used for spindle pole  
704 volume measurements. The “Surfaces” tool was used to determine the volume of each pole,

705 using ASPM-1 staining to define the pole. Images for each condition were collected from at least  
706 three biological replicates.

707 **Figure 5C:** 5C shows representative movies of embryos dissected into either EtOH (vehicle), or  
708 auxin (to deplete ZYG-9). Following auxin treatment, monopolar spindle organization was not  
709 disrupted upon ZYG-9 depletion in 5/5 movies.

710

### 711 **Statistical methods**

712 All statistical analysis was done using a student's two-tailed t test. Data distribution was  
713 assumed to be normal, but this was not formally tested.

714

### 715 **ACKNOWLEDGMENTS**

716 We thank all members of the Wignall lab for support and discussion, and Hannah Horton and  
717 Claire Strothman for critical reading of the manuscript. We thank Bruce Bowerman, Olaf  
718 Bossinger, Arshad Desai, and Abby Dernburg for antibodies and strains. Some strains were  
719 provided by the *Caenorhabditis* Genetics Center (CGC), which is funded by NIH Office of  
720 Research Infrastructure Programs (P40 OD010440). This work was funded by NIH  
721 R01GM124354 (to SMW), by the Carcinogenesis Training Grant T32 CA009560 (to TJM and  
722 GCM), by the Cell and Molecular Basis of Disease Training grant T32GM008061 (to ERC), by  
723 American Heart Association Predoctoral Fellowship 17PRE33440016 (to IDW), and NIH/NIGMS  
724 Molecular Biophysics Training Grant T32GM008382 (to IDW).



## FIGURE 1

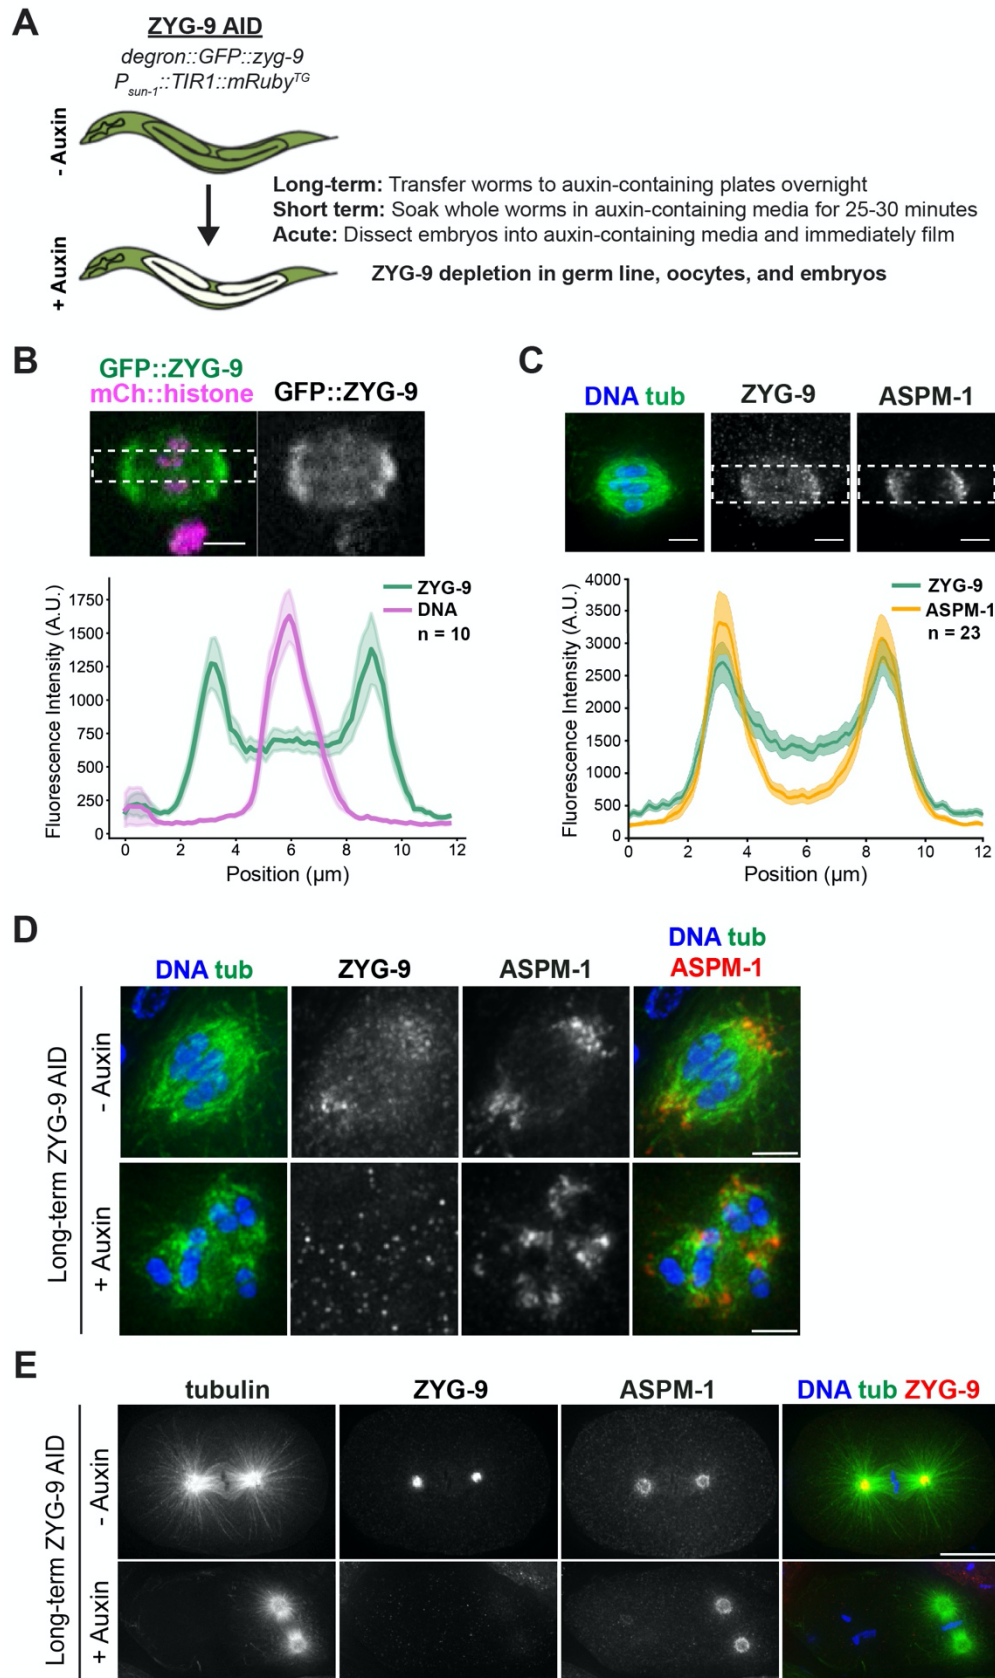

### Figure 1: Validation of a ZYG-9-AID strain

(A) Schematic of the *degron::GFP::ZYG-9* AID strain and description of auxin treatment lengths. ZYG-9 is tagged at the endogenous locus and the TIR1 transgene is expressed from a germline-specific promoter. Types of auxin treatment: (1) Long-term: worms are incubated on auxin-containing plates overnight, (2) Short-term: worms are soaked in auxin-containing media for 25-30 minutes prior to dissecting oocytes for immunofluorescence, (3) Acute: embryos are dissected into auxin-containing media and filmed immediately.

(B) Linescan profiles of *degron::GFP::ZYG-9* (green) and *mCherry::histone* (magenta) fluorescence intensities from metaphase spindles in live oocytes. The plot shows that ZYG-9 is enriched at the poles of the bipolar metaphase spindle, but ZYG-9 is localized in the midspindle region as well. *n* represents the number of spindles analyzed. Bar = 2.5  $\mu\text{m}$ .

(C) Linescan profiles of fixed metaphase spindles stained for DNA (blue), tubulin (green), *degron::GFP::ZYG-9* (using the GFP antibody), and ASPM-1. The plot shows that ZYG-9 is enriched at the spindle poles but also has more signal in the midspindle region than ASPM-1. *n* represents the number of spindles analyzed. Bar = 2.5  $\mu\text{m}$ .

(D) Meiotic oocyte spindles from ZYG-9 AID worms plated overnight on control plates (- auxin) and 1 mM auxin-containing plates (+ auxin) stained for DNA (blue), tubulin (green), ZYG-9 (not shown in merge), and ASPM-1 (red). Long-term ZYG-9 depletion results in the formation of multipolar spindles. Bars = 2.5  $\mu\text{m}$ .

(E) Mitotic spindles in 1-cell stage embryos from ZYG-9 AID worms plated overnight on control plates (- auxin) and 1 mM auxin-containing plates (+ auxin) stained for DNA (blue), tubulin (green), ZYG-9 (red), and ASPM-1 (not shown in merge). Long-term ZYG-9 depletion recapitulates published mitotic phenotypes (Bellanger and Gonczy, 2003; Srayko et al., 2003). Bars = 10  $\mu\text{m}$ .

## FIGURE 1 - figure supplement 1

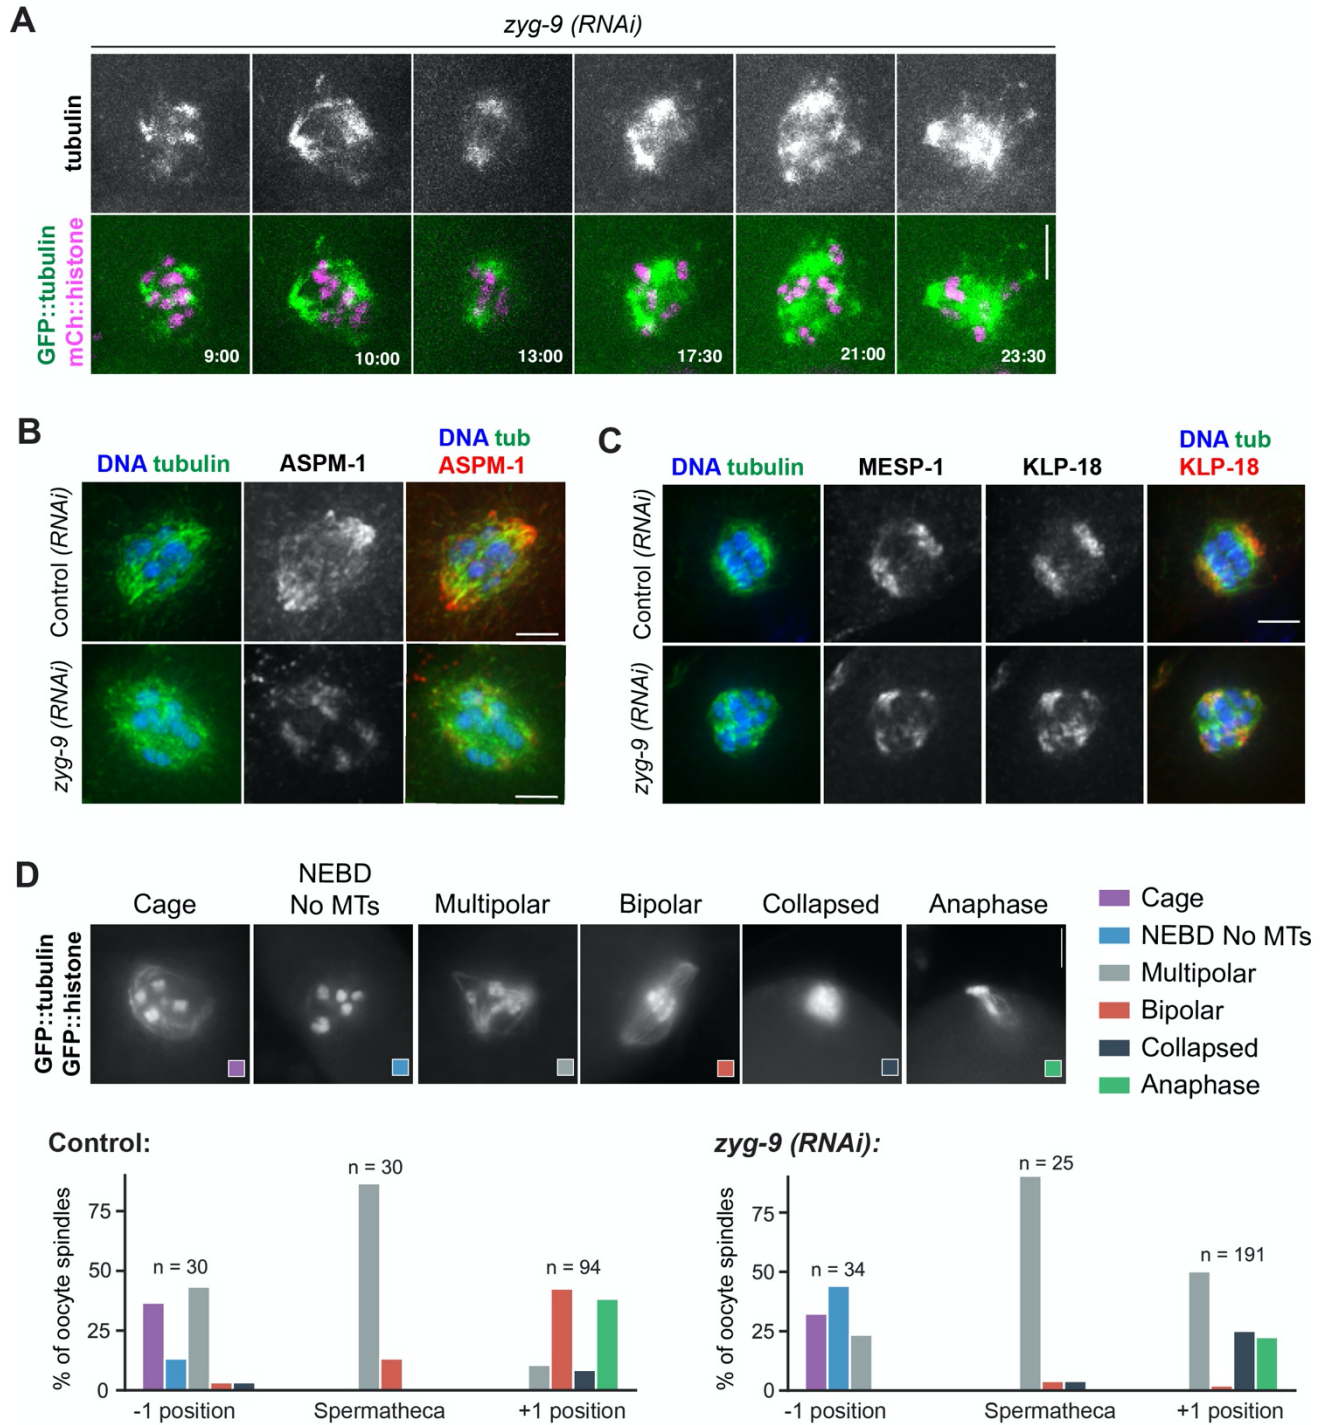

## **Figure 1 – figure supplement 1: ZYG-9 is required for acentrosomal spindle assembly and is enriched at spindle poles**

(A) Movie stills from *zyg-9(RNAi)* oocytes expressing GFP::tubulin (green) and mCherry::histone (magenta). Following *zyg-9(RNAi)*, microtubules appear to nucleate in close proximity to the chromosomes (9:00). As spindle assembly progresses, a bipolar structure transiently forms (13:00) before the poles begin to fragment into multiple pole-like foci (21:00). This multipolar structure then collapses into a mass of tubulin surrounding the chromosomes (23:30). Bar = 5 $\mu$ m. Timestamp = mm:ss.

(B) Control and *zyg-9(RNAi)* spindles stained for DNA (blue), tubulin (green), and ASPM-1 (red). In control spindles, ASPM-1 marks the two poles of the bipolar spindle. Following *zyg-9(RNAi)*, ASPM-1 stains multiple, discrete structures within the oocyte spindle. Bar = 2.5 $\mu$ m.

(C) Control and *zyg-9(RNAi)* spindles stained for DNA (blue), tubulin (green), MESP-1 (not in merge), and KLP-18 (red). In control spindles, MESP-1 and KLP-18 colocalize at the two poles of the bipolar spindle. Following *zyg-9(RNAi)*, MESP-1 and KLP-18 stain multiple, discrete structures within the oocyte spindle. Bar = 2.5 $\mu$ m.

(D) The organization of the *C. elegans* germ line allows extrapolation of temporal information based on where the oocyte is located. Oocytes in the -1 position are ovulated into the spermatheca where they are fertilized and begin the meiotic divisions. The fertilized oocytes exit the spermatheca to the +1 position where they continue meiosis before beginning the mitotic divisions. Quantification of spindle phenotypes in control (left), *zyg-9(RNAi)* (right), and examples of phenotypes (top). This analysis was performed by viewing spindles in live worms expressing GFP::tubulin; GFP::histone. In *zyg-9(RNAi)* oocytes, there is an increase in the number of multipolar and collapsed spindles and a decrease in the number of bipolar spindles found in the +1 position. n represents the number of spindles analyzed at each position. Bar = 5 $\mu$ m.

## FIGURE 1 - figure supplement 2

**A**

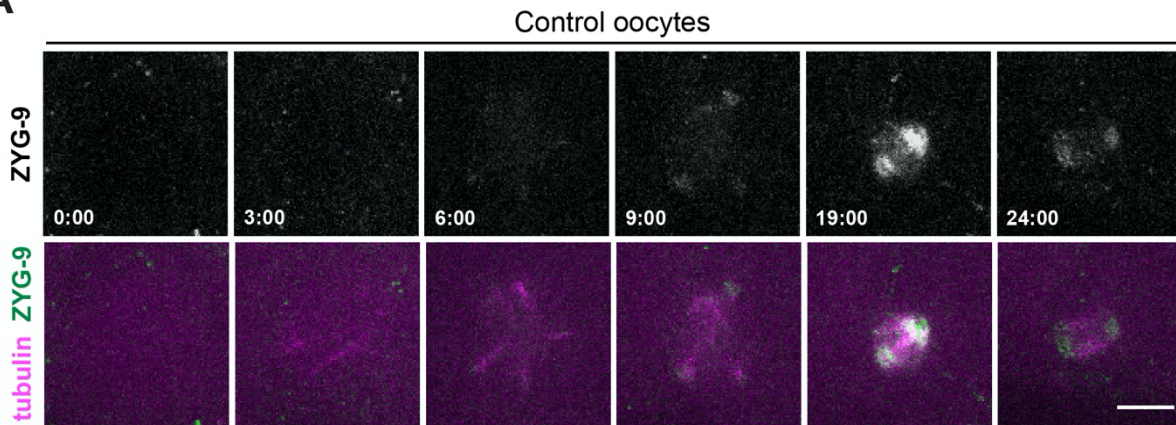

**B**

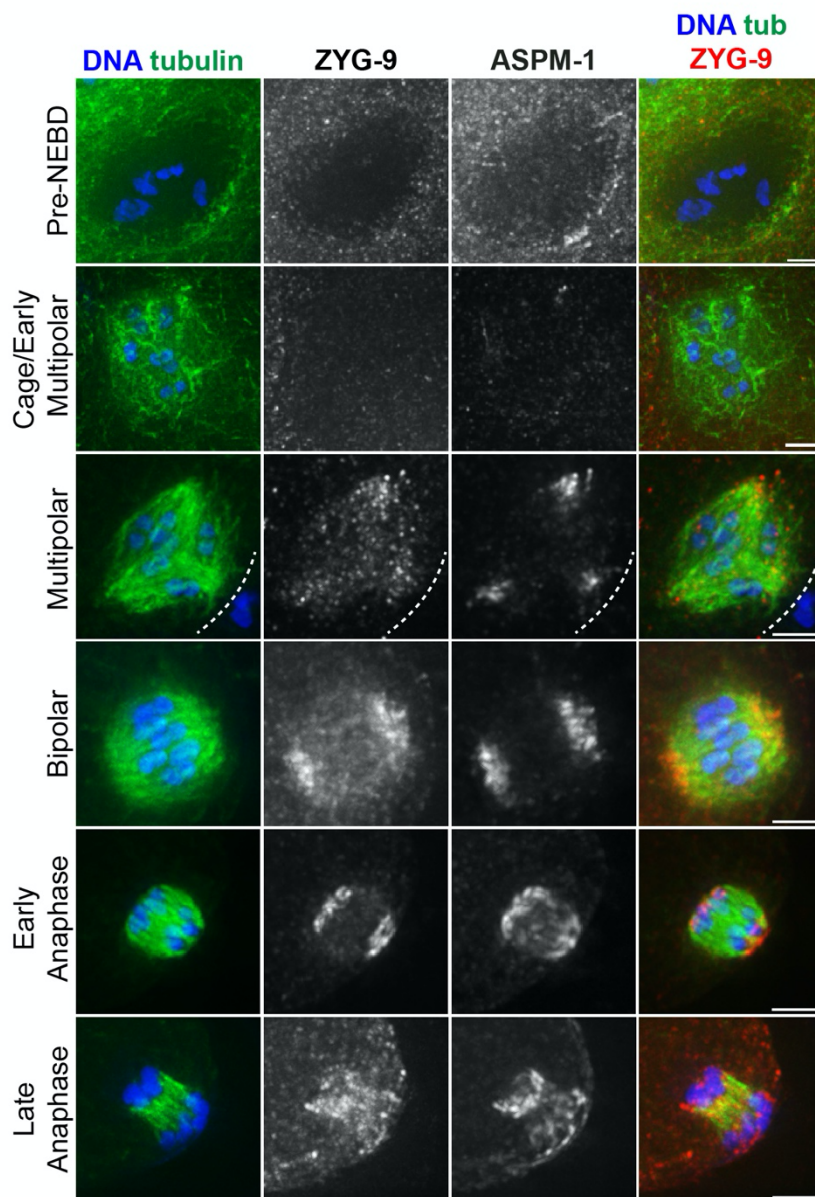

**Figure 1 – figure supplement 2: Imaging of *degron::GFP::ZYG-9* during spindle assembly.**

(A) Movie stills from an oocyte expressing *degron::GFP::ZYG-9* (green) and *mCherry::tubulin* (magenta). *ZYG-9* initially localizes to the spindle microtubules at the multipolar stage (6:00) and becomes progressively enriched on the spindle poles as meiosis progresses (9:00 - 19:00) before dissociating during anaphase (24:00). Bar = 5 $\mu$ m. Timestamp = min:sec.

(B) Oocyte spindles stained for DNA (blue), tubulin (green), *ZYG-9* (red in merge), and ASPM-1. *ZYG-9* localizes to spindle microtubules at the multipolar stage, becomes enriched at the spindle poles as spindle assembly proceeds, then begins to lose enrichment at the poles during anaphase. Bars = 2.5 $\mu$ m.

## FIGURE 1 - figure supplement 3

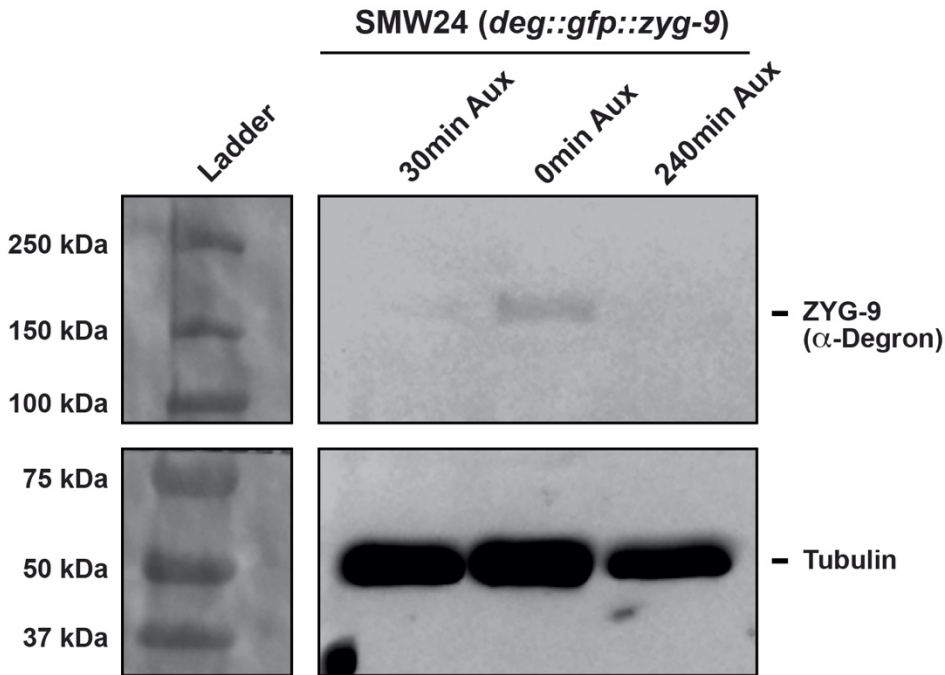

### Figure 1 – figure supplement 3: Analysis of ZYG-9 depletion using Western blotting.

An embryo-only Western blot demonstrating the effectiveness of both short-term and long-term AID depletion of ZYG-9 in the ZYG-9-AID strain expressing *degron::GFP::ZYG-9* (predicted to be ~188 kDa). A faint band of ZYG-9 is present in control sample (middle lane), while no band is present in either the short-term AID (30 minute treatment via soaking; left lane) or long-term AID (240 minute treatment on plates; right lane) embryos, validating the efficiency of AID depletion. Tubulin was utilized as a loading control and ZYG-9 was detected with an anti-degion antibody.

## FIGURE 2

**A**

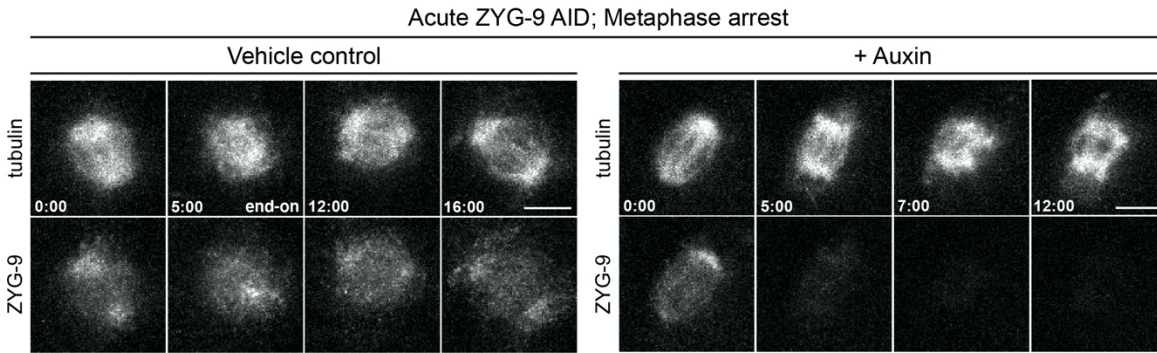

**B**

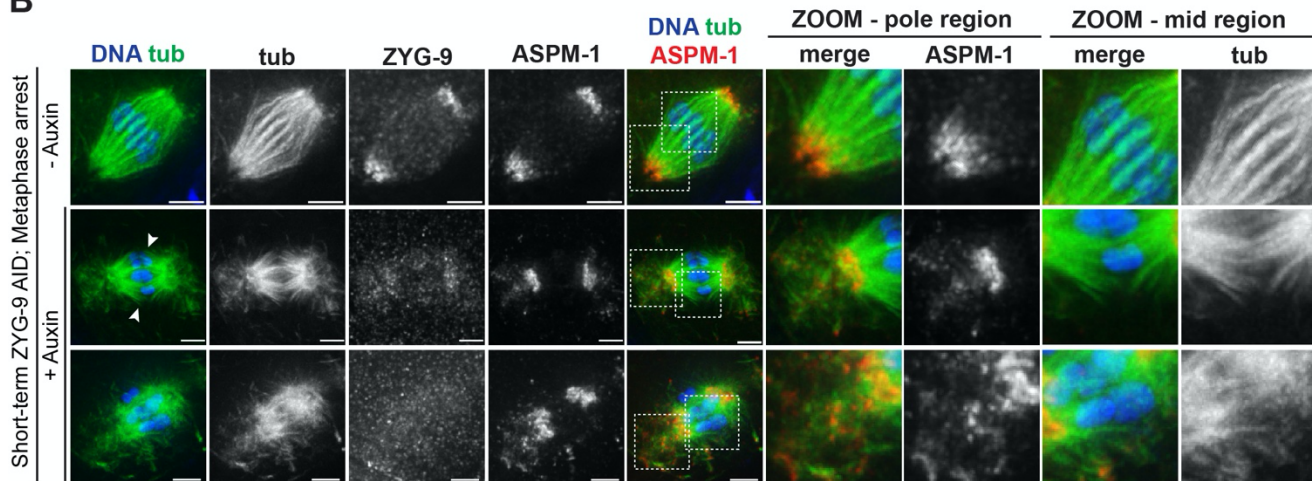

**C**

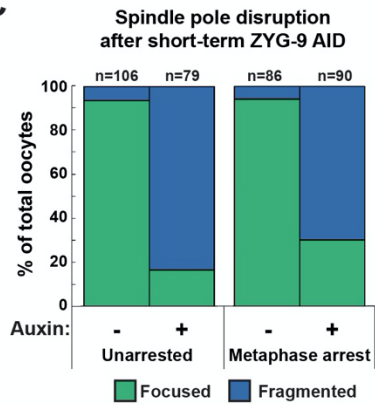

**D**

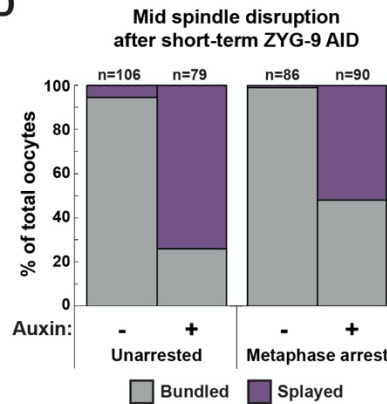

**E**

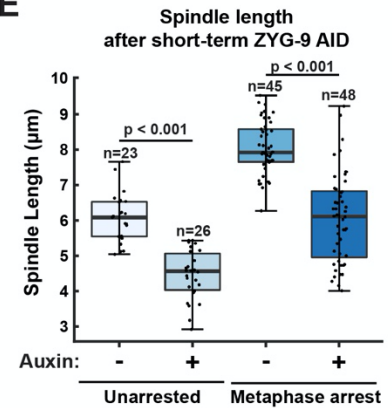



## Figure 2: ZYG-9 is required to maintain spindle pole integrity

(A) Movie stills from Metaphase I-arrested (*emb-30(RNAi)*) oocytes expressing mCherry::tubulin and degron::GFP::ZYG-9 acutely treated with either vehicle (left) or 100 $\mu$ M auxin (right).

Following vehicle treatment, the oocyte spindle maintains ZYG-9 on the spindle and remains bipolar throughout the timecourse. Auxin treatment causes a rapid loss of ZYG-9 signal and a concurrent loss of spindle pole stability highlighted by the unfocusing and fragmentation of the spindle poles. Bars = 5  $\mu$ m. Timestamp = min:sec.

(B) Spindles from Metaphase I-arrested (*emb-30(RNAi)*) oocytes treated with vehicle or 1mM auxin for 25-30 minutes. In vehicle-treated oocyte spindles, the poles are tightly organized, and the microtubule bundles appear to cross from one side of the spindle to the other without interruption. In spindles from auxin-treated oocytes, the ZYG-9 signal is decreased and spindle pole integrity is compromised as shown by the ASPM-1 and tubulin staining coming off the poles away from the spindle (zooms – pole region). Spindles from auxin-treated oocytes also showed defects in midspindle microtubules, where they appeared to terminate near the center of the spindle and splay away from the chromosomes (zooms – mid region). Bars = 2.5  $\mu$ m.

(C, D) Quantification of spindle pole phenotypes (C) or midspindle phenotypes (D) from unarrested (vector control) and Metaphase I-arrested (*emb-30(RNAi)*) oocytes treated with either vehicle or auxin. n represents the number of spindles analyzed.

(E) Quantification of spindle length (pole to pole) in unarrested and Metaphase I-arrested oocytes treated with either vehicle or auxin. Box represents the first quartile, median, and third quartile. Whiskers extend to maxima and minima. Significance determined using a two-tailed t-test. n represents the number of spindles analyzed.

## FIGURE 2 - figure supplement 1

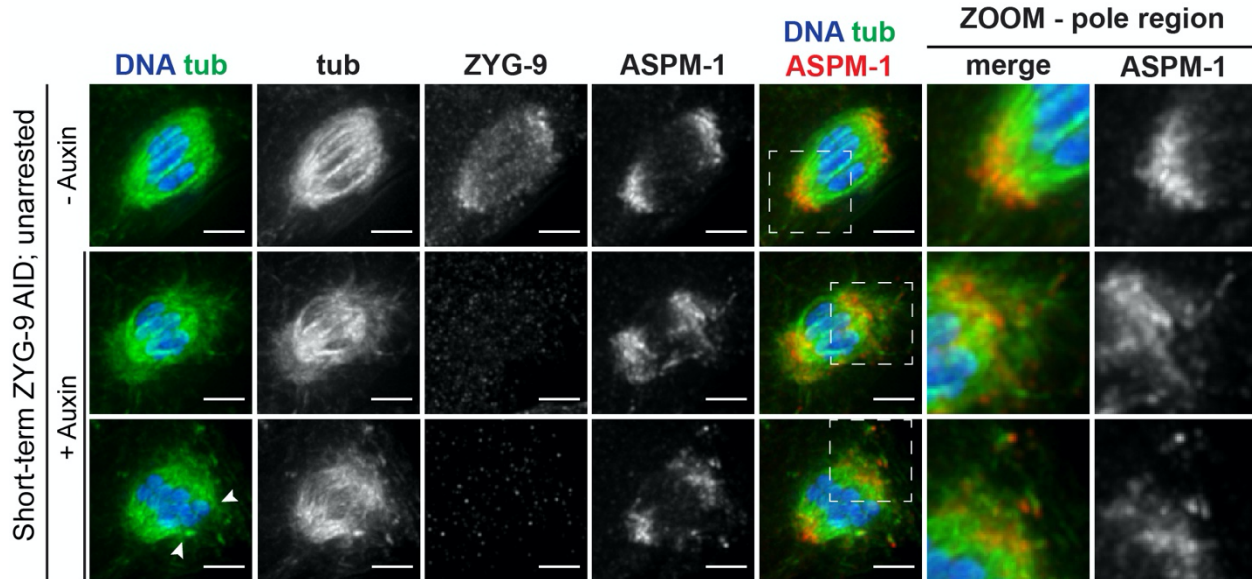

**Figure 2 – figure supplement 1: Short-term AID of ZYG-9 on unarrested bipolar spindles**  
IF imaging of oocyte spindles in *control(RNAi)* conditions treated with either vehicle or 1mM auxin solution for 25-30 minutes prior to dissection and fixation, stained for DNA (blue), tubulin (green), ZYG-9 (not in merge), and ASPM-1 (red). All ZYG-9 depletion phenotypes observed in Metaphase I-arrested conditions (Figure 2B) are apparent in unarrested conditions as well (midspindle disruption highlighted with arrowheads). Zooms of pole regions in auxin-treated spindles clearly display fragmentation of poles seen by dispersal of tubulin and ASPM-1 signal and individual fragments. Bars = 2.5  $\mu$ m.

## FIGURE 3

**A**

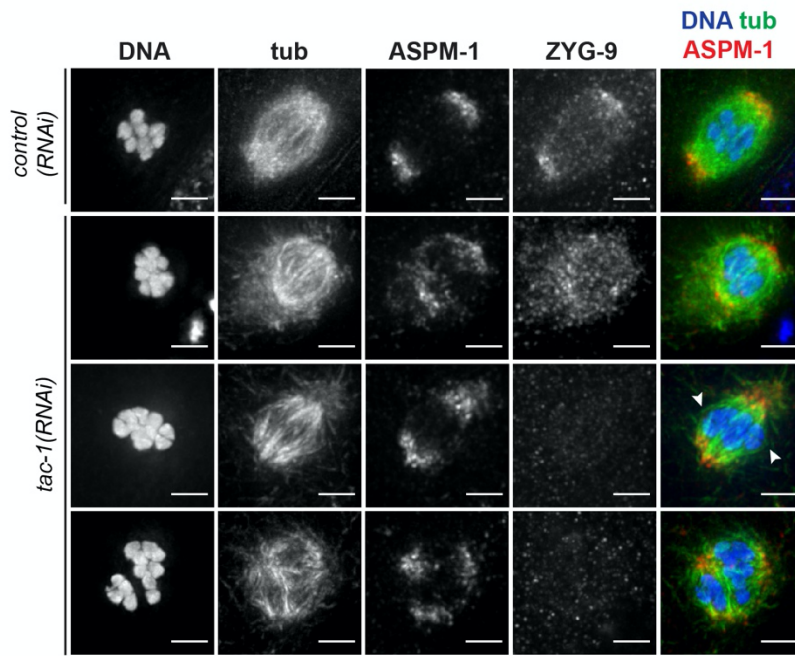

**B**

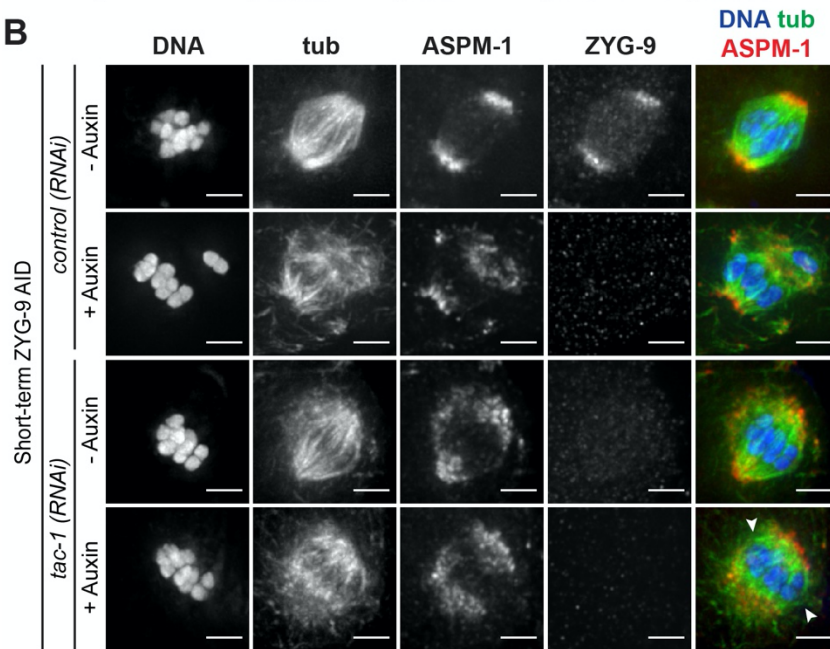

**C**

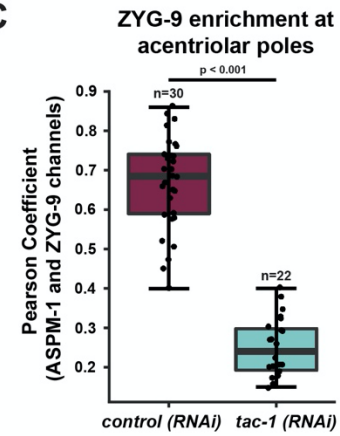

**D**

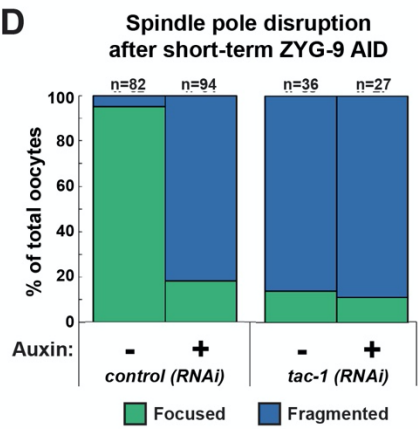

**E**

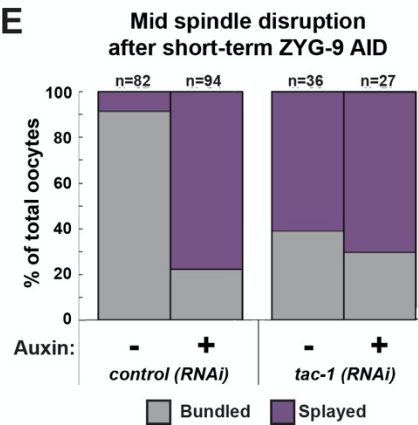

**Figure 3: TAC-1 is required for proper localization of ZYG-9 to meiotic spindles.**

(A) IF imaging of oocyte spindles in either control or *tac-1(RNAi)* conditions. Shown are DNA (blue), tubulin (green), ASPM-1 (red), and ZYG-9 (not shown in merge). ZYG-9 enrichment at acentrosomal poles is lost in most spindles observed, and some spindles appear to have lost all ZYG-9 localization to the meiotic spindle; midspindle disruption is highlighted with arrowheads. Bars = 2.5 $\mu$ m.

(B) IF imaging of oocyte spindles in either control or *tac-1(RNAi)* conditions. Shown are DNA (blue), tubulin (green), ASPM-1 (red), and ZYG-9 (not shown in merge). Whether subjected to *tac-1(RNAi)* alone or concurrently with short-term ZYG-9 AID depletion, spindle phenotypes mimic those observed in short-term ZYG-9 AID depletion alone (midspindle disruption is highlighted with arrowheads). Bars = 2.5 $\mu$ m.

(C) Quantification of ZYG-9 enrichment at poles from oocyte spindles observed in (A); a Pearson coefficient was calculated for each image by comparing the ZYG-9 and ASPM-1 channels. Total spindles measured in each condition are noted above box plots; boxes represent first quartile, median, and third quartile.

(D) Quantification of acentrosomal pole fragmentation from oocyte spindles observed in (B); total spindles counted in each condition are noted above stacked bars.

(E) Quantification of midspindle microtubule splaying from oocyte spindles observed in (B); total spindles counted in each condition are noted above stacked bars.

## FIGURE 4

**A**

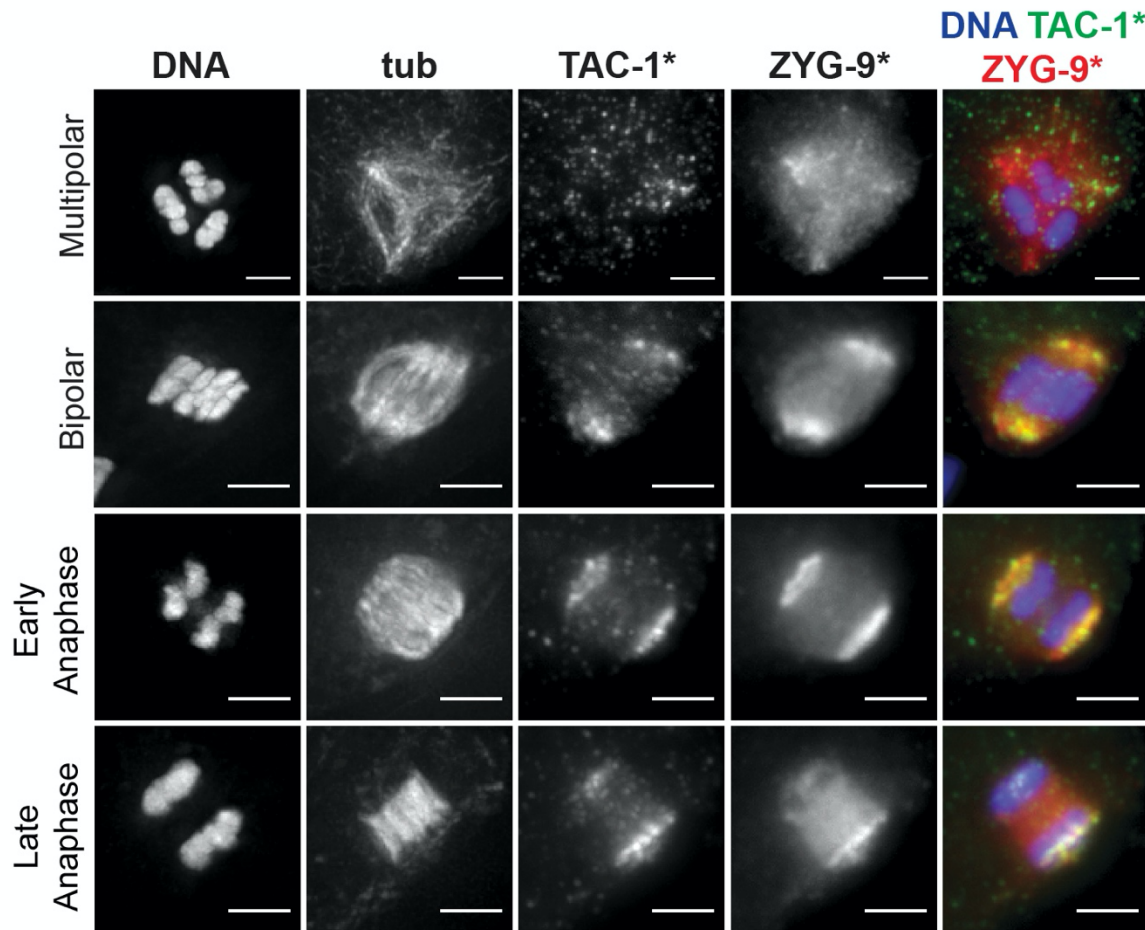

\* undeconvolved images

**B**

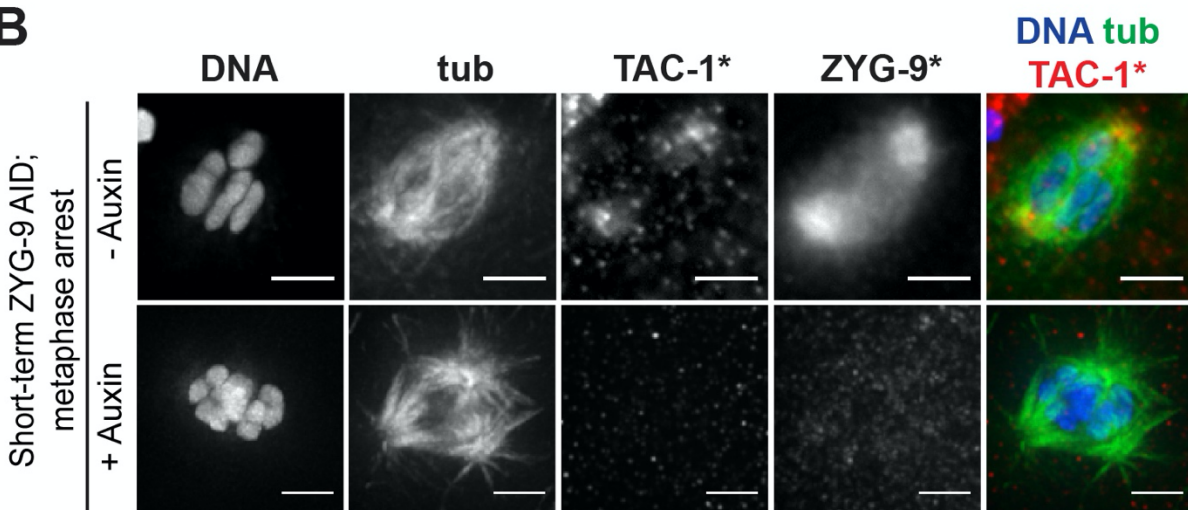

\* undeconvolved images

**Figure 4: TAC-1 and ZYG-9 are interdependent for localization to acentrosomal poles**

(A) IF imaging of oocyte spindles; shown are DNA (blue), TAC-1 (green), ZYG-9 (red), and tubulin (not shown in merge). Colocalization of TAC-1 and ZYG-9 is evident in metaphase and persists throughout anaphase. DNA and Tubulin channels were deconvolved, while ZYG-9 and TAC-1 channels were not due to higher background staining of the TAC-1 antibody. Bars = 2.5 $\mu$ m.

(B) IF imaging of oocyte spindles in Metaphase I-arrest (*emb-30(RNAi)*) conditions; shown are DNA (blue), tubulin (green), TAC-1 (red), and ZYG-9 (not shown in merge). Short-term ZYG-9 depletion disrupts localization of TAC-1 to acentrosomal poles. As in (A), ZYG-9 and TAC-1 channels were not deconvolved. Bars = 2.5 $\mu$ m.

## FIGURE 4 - figure supplement 1

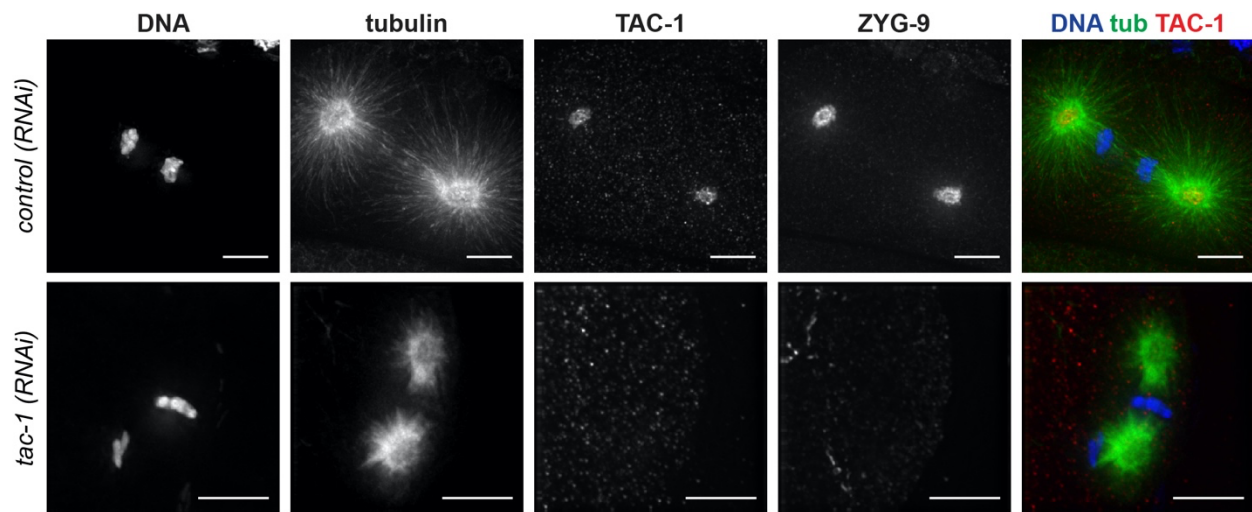

### Figure 4 – figure supplement 1: TAC-1 Antibody Validation

Verification of TAC-1 antibody using IF imaging of one-cell mitotic embryos. TAC-1 localizes to centrosomes, and colocalizes with ZYG-9, as previously described (Bellanger and Gonczy, 2003; Srayko et al., 2003). Utilizing *tac-1(RNAi)* demonstrates that TAC-1 staining is specific, as no staining occurs when TAC-1 is depleted. Also consistent with previous studies, loss of TAC-1 leads to loss of ZYG-9 at centrosomes and results in defects in mitotic spindle positioning and spindle length. Bars = 5 $\mu$ m.

## FIGURE 5

A

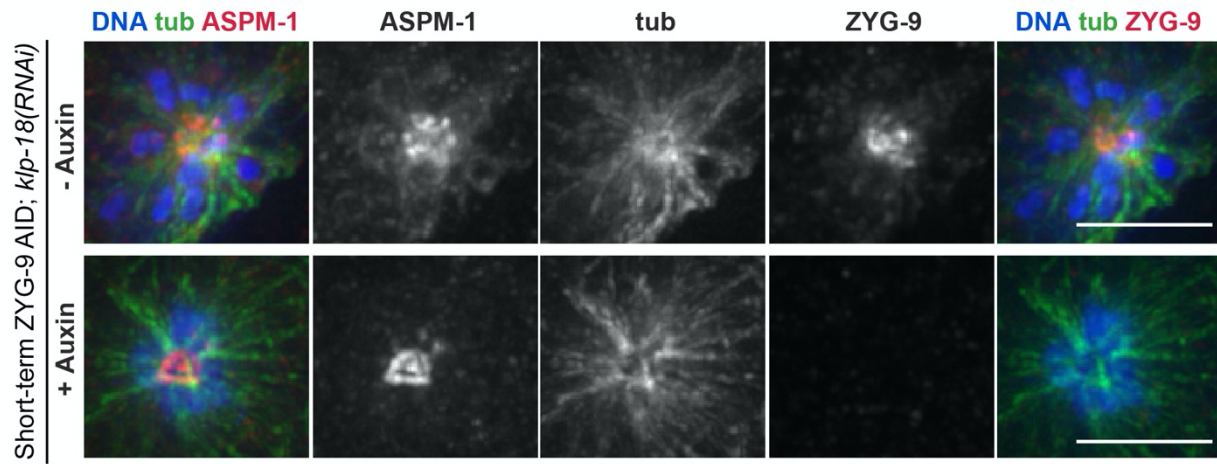

B

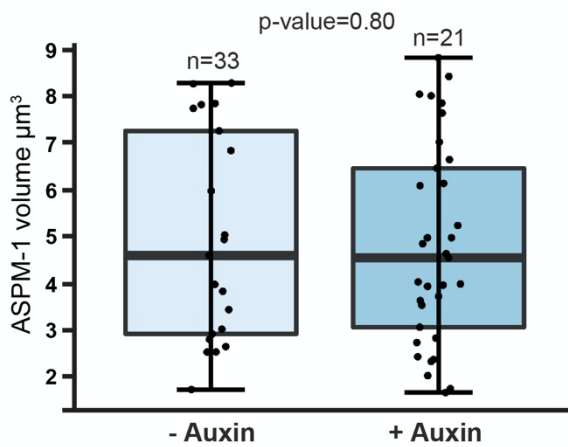

C

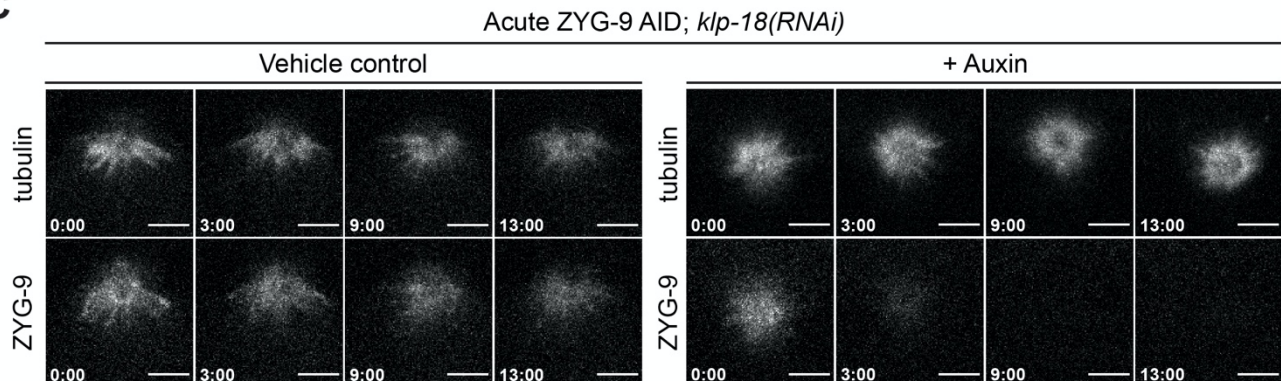



**Figure 5: ZYG-9 is not required for acentrosomal pole stability of monopolar spindles**

(A) IF imaging of oocyte spindles in *klp-18(RNAi)* conditions; shown are DNA (blue), microtubules (green), ZYG-9 (red, merge on the right), and ASPM-1 (red, merge on the left). When depleting ZYG-9 via short-term auxin treatment, monopolar spindles appear unperturbed, as can be seen through a singular, focused pole of ASPM-1. Bars = 2.5 $\mu$ m.

(B) Quantification of IF imaging represented in (A); there is no significant difference in the volume of monopolar spindles between untreated and auxin-treated conditions. Box represents the first quartile, median, and third quartile. Whiskers extend to maxima and minima.

Significance determined using a two-tailed t-test. n represents the number of spindles analyzed.

(C) Movie stills from *klp-18(RNAi)* oocytes expressing mCherry::tubulin and degron::GFP::ZYG-9 acutely treated with either vehicle (left) or 100 $\mu$ M auxin (right). Auxin treatment causes a rapid loss of ZYG-9 signal but the structure of the monopolar spindle does not noticeably change.

Bars = 5  $\mu$ m. Timestamp = min:sec.

## FIGURE 6

A

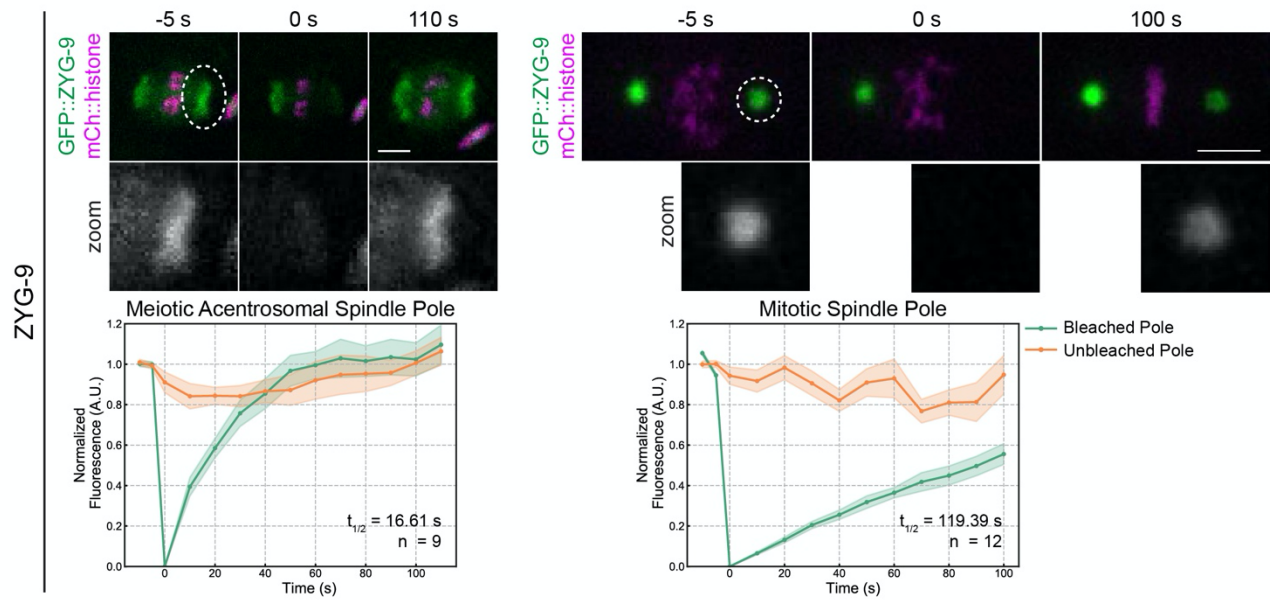

B

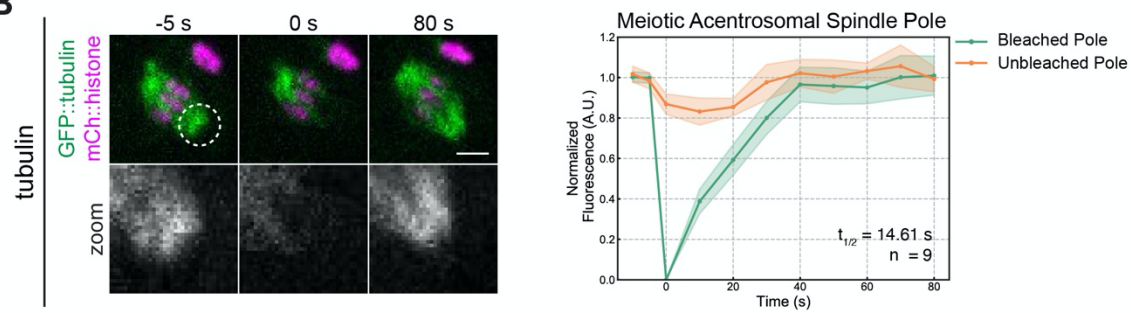

C

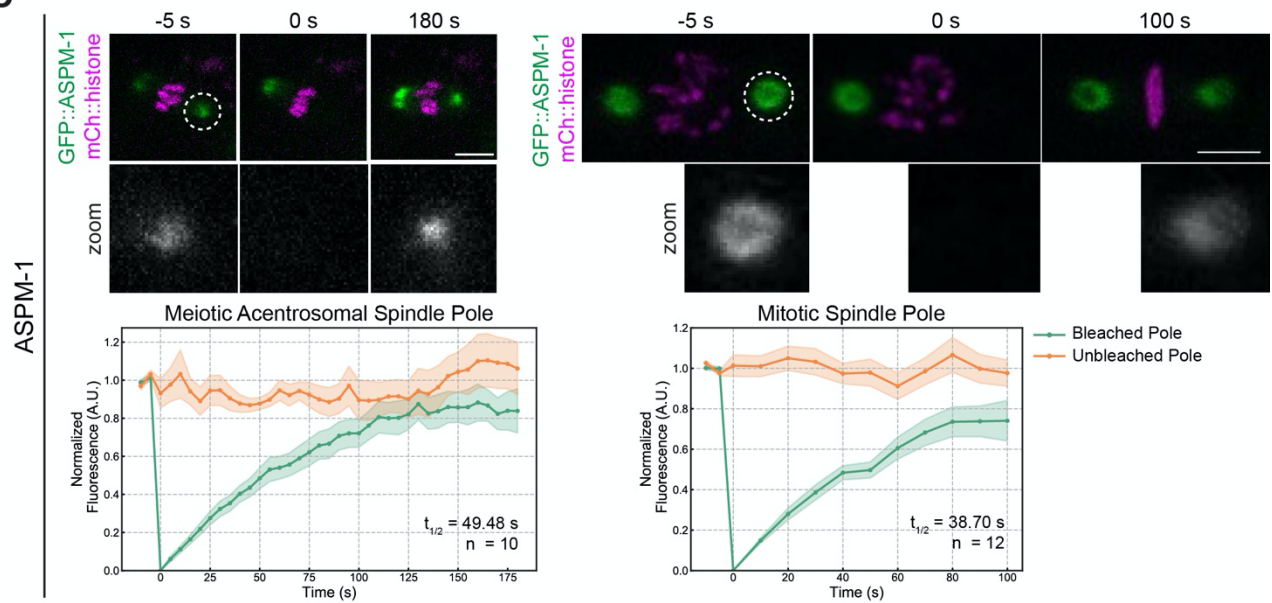

### **Figure 6: FRAP analysis of ZYG-9 and ASPM-1 at acentrosomal poles compared to at centrosomes**

(A-C) FRAP recovery curves and stills from movies for ZYG-9 (A), tubulin (B), and ASPM-1 (C) at meiotic and mitotic spindle poles (except for tubulin; only recovery at the meiotic spindle is shown). In graphs, the bleached pole curve is green, the unbleached pole curve is orange, the solid lines are the average, and the standard error of the mean is shaded. For all images, the specified bleached protein is in green and the chromosomes are in magenta. Zooms show only the bleached region.  $t_{1/2}$  was calculated from fitting the recovery curves to a single exponential function (Materials and Methods); see Supplemental Figure 5.  $n$  represents the number of spindles analyzed to generate each curve. ZYG-9 is highly dynamic at acentrosomal spindle poles, displaying a similar recovery time to tubulin, while ASPM-1 turns over less rapidly and has similar dynamics at centrosome-containing and acentrosomal poles. Bars = 2.5 $\mu$ m (meiosis) and 5 $\mu$ m (mitosis).

## FIGURE 6 - figure supplement 1

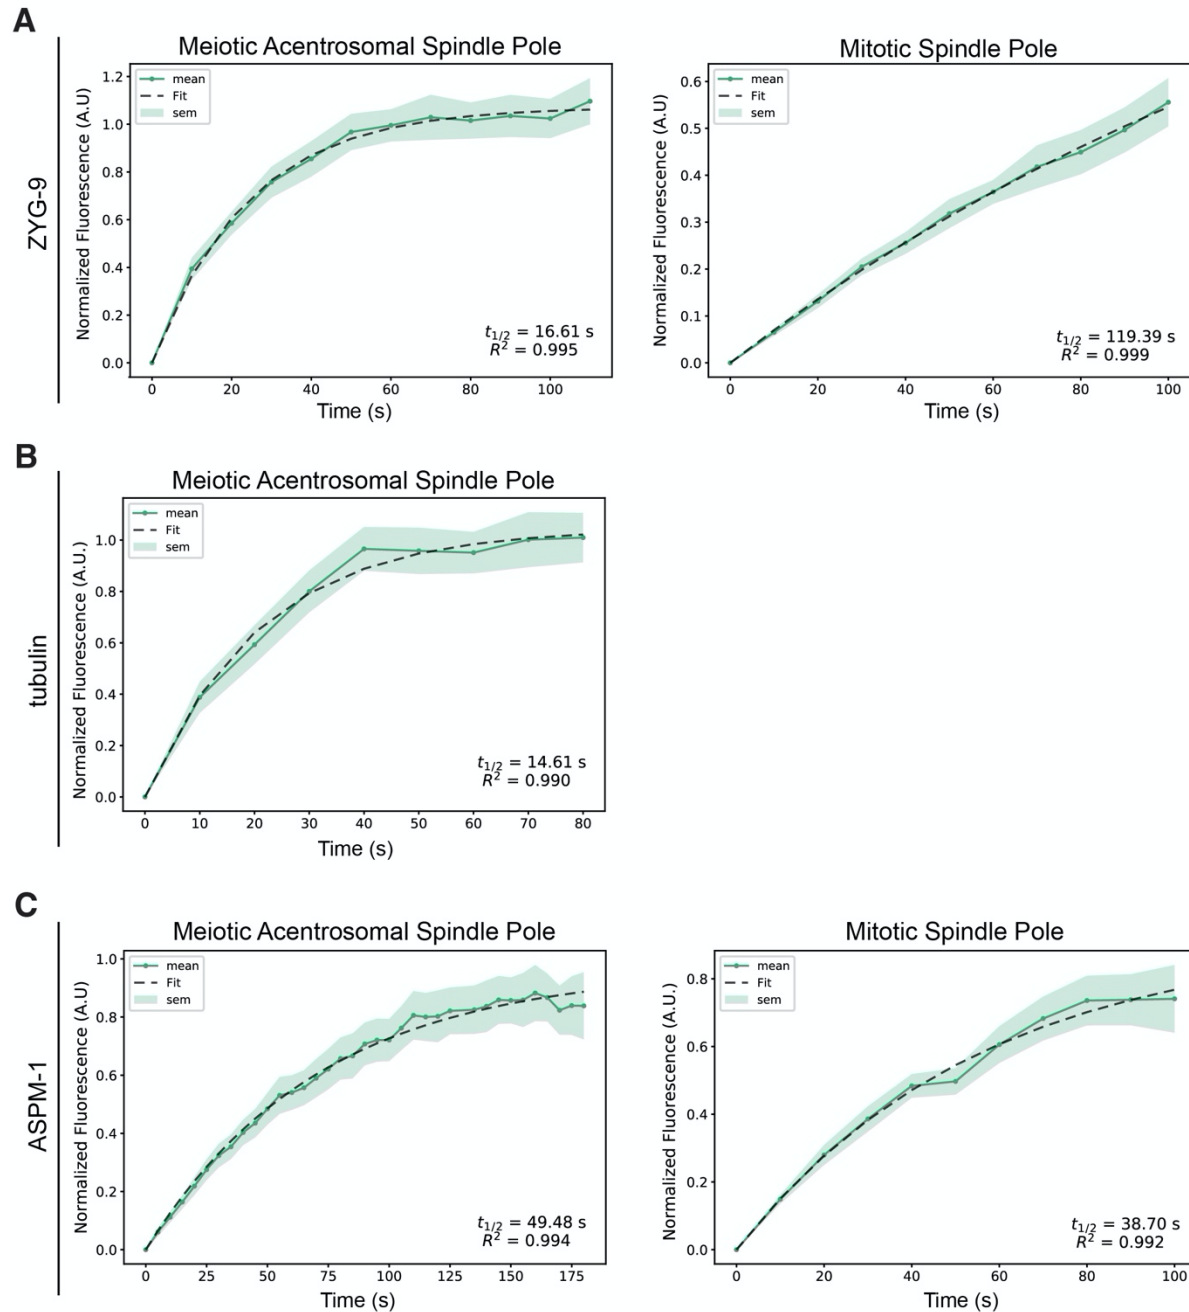

### Figure 6 – figure supplement 1: FRAP analysis with fit curves.

(A-C) graphs of recovery curves and fit curves from the bleached poles of the FRAP experiments described in Figure 6. The mean is a solid line, the standard error of the mean is the shaded region, and the fit from the single exponential function is a dashed line. The  $t_{1/2}$ 's were calculated from these fit curves.

## FIGURE 7

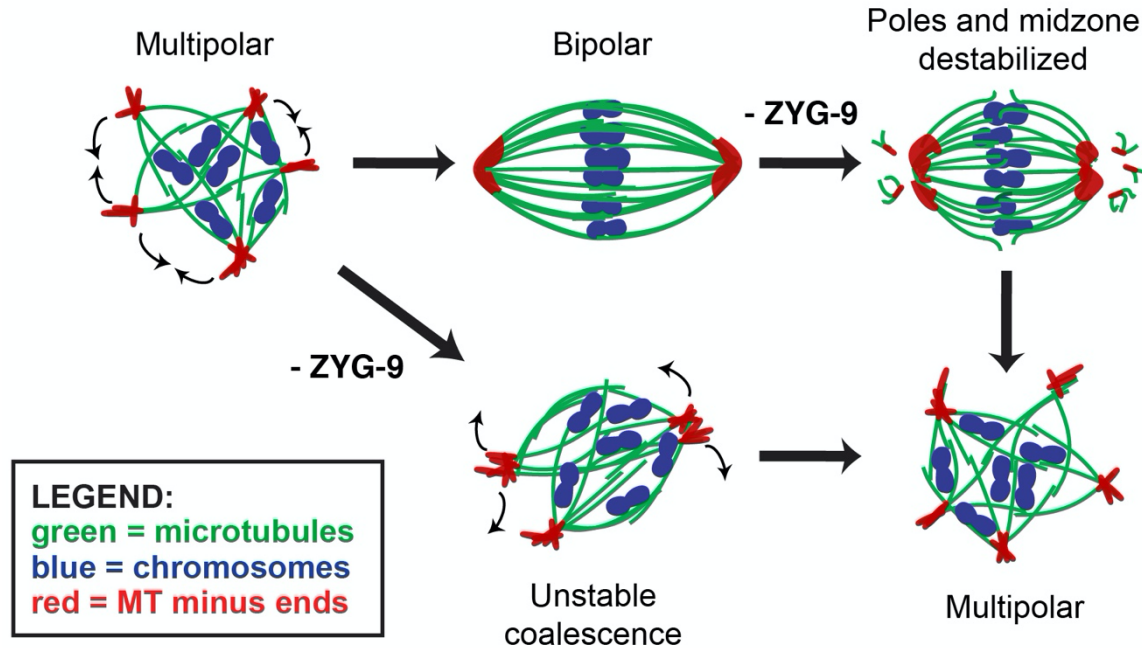

### Figure 7: Model of acentrosomal pole coalescence and stability provided by ZYG-9

ZYG-9 is required to establish and maintain acentrosomal pole stability during meiosis. Removal of ZYG-9 prior to spindle assembly prevents multipolar spindles from stably coalescing into bipolar spindles. Additionally, removing ZYG-9 from stable bipolar spindles causes severe splaying of microtubule bundles near chromosomes and fragmentation of acentrosomal poles, ultimately causing the spindle to lose bipolarity and revert to a multipolar state, demonstrating that ZYG-9 is continuously required for maintaining stable bipolar spindles.

725 **SUPPLEMENTAL VIDEOS**

726

727 **Video 1. Live imaging of spindle assembly following *zyg-9(RNAi)*.**

728 *In utero* imaging of a *zyg-9(RNAi)* embryo expressing mCherry::histone and GFP::tubulin (left);

729 GFP::tubulin alone is shown on the right. Corresponds to Figure 1 – figure supplement 1A.

730 Following ZYG-9 depletion, a transient bipolar spindle forms but then poles split apart and

731 become unstable. Time elapsed shown in (min):(sec). Scale bar = 10µm.

732

733 **Video 2. ZYG-9 localization during oocyte meiosis.**

734 *In utero* imaging of control embryo expressing mCherry::tubulin and GFP::ZYG-9 (left);

735 GFP::ZYG-9 alone is shown on the right. Corresponds to Figure 1 – figure supplement 2A.

736 ZYG-9 localizes to spindles at the multipolar stage, and is enriched at poles in metaphase and

737 anaphase. Time elapsed shown in (min):(sec). Scale bar = 10µm.

738

739 **Video 3. Auxin treatment rapidly depletes ZYG-9 and causes spindle instability.**

740 Shows a metaphase-arrested embryo expressing mCherry::tubulin (left), dissected into Meiosis

741 Media containing 100µM auxin to deplete ZYG-9. Corresponds to Figure 2A. Once dissected

742 into auxin solution, rapid depletion of degraon::GFP::ZYG-9 (right) is evident and spindle poles

743 become unstable. Time elapsed shown in (min):(sec). Scale bar = 5µm.

744

745 **Video 4. Auxin treatment rapidly depletes ZYG-9 and causes spindle instability.**

746 Another example of a metaphase-arrested embryo expressing mCherry::tubulin (top), dissected

747 into Meiosis Media containing 100µM auxin to deplete ZYG-9. Once dissected into auxin

748 solution, rapid depletion of degraon::GFP::ZYG-9 (bottom) is evident and spindle poles become

749 unstable. Time elapsed shown in (min):(sec). Scale bar = 5µm.

750

751 **Video 5. Metaphase-arrested spindles remain stable without auxin treatment.**

752 Shows a metaphase-arrested embryo expressing mCherry::tubulin (left) and

753 degraon::GFP::ZYG-9 (right), dissected into a control Meiosis Media solution. Corresponds to

754 Figure 2A. No major changes in spindle length or shape occur. Note that the spindle rotates

755 end-on for a portion of the video, but when it rotates back it is clear that the morphology of

756 spindle has not changed. Time elapsed shown in (min):(sec). Scale bar = 5µm.

757

758 **Video 6. Monopolar spindle organization does not change following acute ZYG-9**  
759 **depletion.**

760 Shows an embryo expressing mCherry::tubulin (left) and degron::GFP::ZYG-9 (right) following  
761 *klp-18(RNAi)*, dissected into Meiosis Media containing 100 $\mu$ M auxin to deplete ZYG-9.

762 Corresponds to Figure 5C. Upon dissection into auxin solution, ZYG-9 is rapidly depleted but  
763 the organization of the monopole does not noticeably change. Time elapsed shown in  
764 (min):(sec). Scale bar = 5 $\mu$ m.

765

766 **Video 7. Monopolar spindles remain stable without auxin treatment.**

767 Shows a *klp-18(RNAi)* embryo expressing mCherry::tubulin (left) and degron::GFP::ZYG-9  
768 (right), dissected into a control Meiosis Media solution. Corresponds to Figure 5C. No major  
769 changes in monopole organization occurs during the course of the movie. Time elapsed shown  
770 in (min):(sec). Scale bar = 5 $\mu$ m.

771

772 **Video 8. FRAP of ZYG-9 at the poles of acentrosomal oocyte spindles.**

773 Shows a Metaphase II oocyte spindle labeled with degron::GFP::ZYG-9 and mCherry::histone;  
774 the polar body is on the left side of the spindle. During the video the pole on the left is  
775 photobleached but fluorescence quickly recovers. Corresponds to Figure 6A. Time elapsed  
776 shown in seconds. Scale bar = 2.5 $\mu$ m.

777

778 **Video 9. FRAP of ZYG-9 at the poles of mitotic centrosome-containing spindles.**

779 Shows a mitotic spindle in the EMS cell of the 4-cell embryo, labeled with degron::GFP::ZYG-9  
780 and mCherry::histone. During the video the pole on the right is photobleached. Fluorescence  
781 recovers but more slowly than on acentrosomal poles. Corresponds to Figure 6A. Time elapsed  
782 shown in seconds. Scale bar = 5 $\mu$ m.

783

784 **Video 10. FRAP of tubulin at the poles of acentrosomal oocyte spindles.**

785 Shows a Metaphase II oocyte spindle labeled with degron::GFP::ZYG-9 and mCherry::histone;  
786 the polar body is on the right side of the spindle. During the video the pole on the bottom is  
787 photobleached but fluorescence quickly recovers. Corresponds to Figure 6B. Time elapsed  
788 shown in seconds. Scale bar = 2.5 $\mu$ m.

789

790 **Video 11`. FRAP of ASPM-1 at the poles of acentrosomal oocyte spindles.**

791 Shows a Metaphase II oocyte spindle labeled with GFP::ASPM-1 and mCherry::histone; the  
792 polar body is not visible in the selected z-stacks. During the video the pole on the left is  
793 photobleached. Corresponds to Figure 6C. Time elapsed shown in seconds. Scale bar = 2.5 $\mu$ m.

794

795 **Video 12. FRAP of ASPM-1 at the poles of mitotic centrosome-containing spindles.**

796 Shows a mitotic spindle in the EMS cell of the 4-cell embryo, labeled with GFP::ASPM-1 and  
797 mCherry::histone. During the video the pole on the left is photobleached. Corresponds to Figure  
798 6C. Time elapsed shown in seconds. Scale bar = 5 $\mu$ m.

799

800

801 **SOURCE DATA LEGENDS**

802

803 **Figure 1.** The source data for Figures 1B and 1C are provided. For Figure 1B, the x-axis  
804 position value is listed alongside the fluorescence intensity measurements for each file; the DNA  
805 measurements and ZYG-9 measurements are listed in separate tabs. The data for Figure 1C is  
806 listed in a third tab; for each file, the raw intensity values for ZYG-9 and ASPM-1 are provided  
807 for each position along the x-axis. Average values and standard errors are also listed.

808

809 **Figure 2.** The source data for Figure 2E is provided; measurements for unarrested  
810 (*control(RNAi)*) and Metaphase I-arrested (*emb-30(RNAi)*) spindles are listed in separate tabs.  
811 The spindle length measurements (in  $\mu$ m) are provided for each image, as well as the averages  
812 lengths and standard errors with and without auxin.

813

814 **Figure 3.** The source data for Figure 3C is provided; *control(RNAi)* and *tac-1(RNAi)* data are  
815 listed in separate tabs. The Pearson's coefficient between ASPM-1 and ZYG-9 are provided for  
816 each of the measured images.

817

818 **Figure 5.** The source data for Figure 5B is provided. Volume measurements for control (minus  
819 auxin) and plus auxin are listed in separate tabs.

820

821 **Figure 6.** The source data for all graphs in Figure 6 are provided as separate tabs. The time (in  
822 seconds) is listed, along with the fluorescence intensity measurement at that timepoint for each



823 of the analyzed movies;  $t=0$  was set as the time of bleaching. The measurements for the  
824 bleached pole and the unbleached pole are listed in separate tabs.

## **REFERENCES**

- Arribere, J.A., R.T. Bell, B.X. Fu, K.L. Artilles, P.S. Hartman, and A.Z. Fire. 2014. Efficient marker-free recovery of custom genetic modifications with CRISPR/Cas9 in *Caenorhabditis elegans*. *Genetics*. 198:837-846.
- Ayaz, P., X. Ye, P. Huddleston, C.A. Brautigam, and L.M. Rice. 2012. A TOG:alphabeta-tubulin complex structure reveals conformation-based mechanisms for a microtubule polymerase. *Science*. 337:857-860.
- Barros, T.P., K. Kinoshita, A.A. Hyman, and J.W. Raff. 2005. Aurora A activates D-TACC-Msps complexes exclusively at centrosomes to stabilize centrosomal microtubules. *J Cell Biol.* 170:1039-1046.
- Bellanger, J.M., J.C. Carter, J.B. Phillips, C. Canard, B. Bowerman, and P. Gonczy. 2007. ZYG-9, TAC-1 and ZYG-8 together ensure correct microtubule function throughout the cell cycle of *C. elegans* embryos. *J Cell Sci.* 120:2963-2973.
- Bellanger, J.M., and P. Gonczy. 2003. TAC-1 and ZYG-9 form a complex that promotes microtubule assembly in *C. elegans* embryos. *Curr Biol.* 13:1488-1498.
- Brouhard, G.J., J.H. Stear, T.L. Noetzel, J. Al-Bassam, K. Kinoshita, S.C. Harrison, J. Howard, and A.A. Hyman. 2008. XMAP215 is a processive microtubule polymerase. *Cell.* 132:79-88.
- Cassimeris, L., and J. Morabito. 2004. TOGp, the human homolog of XMAP215/Dis1, is required for centrosome integrity, spindle pole organization, and bipolar spindle assembly. *Mol Biol Cell.* 15:1580-1590.
- Cavin-Meza, G., M.M. Kwan, and S.M. Wignall. 2021. Multiple motors cooperate to establish and maintain acentrosomal spindle bipolarity in *C. elegans* oocyte meiosis. *BioRxiv:2021.2009.2009.459640*.
- Chuang, C.H., A.J. Schlientz, J. Yang, and B. Bowerman. 2020. Microtubule assembly and pole coalescence: early steps in *C. elegans* oocyte meiosis I spindle assembly. *Biol Open.* 9.
- Connolly, A.A., V. Osterberg, S. Christensen, M. Price, C. Lu, K. Chicas-Cruz, S. Lockery, P.E. Mains, and B. Bowerman. 2014. *Caenorhabditis elegans* oocyte meiotic spindle pole assembly requires microtubule severing and the calponin homology domain protein ASPM-1. *Mol Biol Cell.* 25:1298-1311.
- Connolly, A.A., K. Sugioka, C.H. Chuang, J.B. Lowry, and B. Bowerman. 2015. KLP-7 acts through the Ndc80 complex to limit pole number in *C. elegans* oocyte meiotic spindle assembly. *J Cell Biol.* 210:917-932.
- Crowder, M.E., J.R. Flynn, K.P. McNally, D.B. Cortes, K.L. Price, P.A. Kuehnert, M.T. Panzica, A. Andaya, J.A. Leary, and F.J. McNally. 2015. Dynactin-dependent cortical dynein and spherical spindle shape correlate temporally with meiotic spindle rotation in *Caenorhabditis elegans*. *Mol Biol Cell.* 26:3030-3046.
- Cullen, C.F., and H. Ohkura. 2001. Msps protein is localized to acentrosomal poles to ensure bipolarity of *Drosophila* meiotic spindles. *Nat Cell Biol.* 3:637-642.
- Davis-Roca, A.C., N.S. Divekar, R.K. Ng, and S.M. Wignall. 2018. Dynamic SUMO remodeling drives a series of critical events during the meiotic divisions in *Caenorhabditis elegans*. *PLoS Genet.* 14:e1007626.
- Davis-Roca, A.C., C.C. Muscat, and S.M. Wignall. 2017. *Caenorhabditis elegans* oocytes detect meiotic errors in the absence of canonical end-on kinetochore attachments. *J Cell Biol.* 216:1243-1253.
- Decker, M., S. Jaensch, A. Pozniakovsky, A. Zinke, K.F. O'Connell, W. Zachariae, E. Myers, and A.A. Hyman. 2011. Limiting amounts of centrosome material set centrosome size in *C. elegans* embryos. *Curr Biol.* 21:1259-1267.

- Divekar, N.S., A.C. Davis-Roca, L. Zhang, A.F. Dernburg, and S.M. Wignall. 2021a. A degron-based strategy reveals new insights into Aurora B function in *C. elegans*. *PLoS Genet.* 17:e1009567.
- Divekar, N.S., H.E. Horton, and S.M. Wignall. 2021b. Methods for Rapid Protein Depletion in *C. elegans* using Auxin-Inducible Degradation. *Curr Protoc.* 1:e16.
- Ellefson, M.L., and F.J. McNally. 2009. Kinesin-1 and cytoplasmic dynein act sequentially to move the meiotic spindle to the oocyte cortex in *Caenorhabditis elegans*. *Mol Biol Cell.* 20:2722-2730.
- Ellefson, M.L., and F.J. McNally. 2011. CDK-1 inhibits meiotic spindle shortening and dynein-dependent spindle rotation in *C. elegans*. *The Journal of cell biology.* 193:1229-1244.
- Farmer, V., G. Arpag, S.L. Hall, and M. Zanic. 2021. XMAP215 promotes microtubule catastrophe by disrupting the growing microtubule end. *J Cell Biol.* 220.
- Fraser, A.G., R.S. Kamath, P. Zipperlen, M. Martinez-Campos, M. Sohrmann, and J. Ahringer. 2000. Functional genomic analysis of *C. elegans* chromosome I by systematic RNA interference. *Nature.* 408:325-330.
- Furuta, T., S. Tuck, J. Kirchner, B. Koch, R. Auty, R. Kitagawa, A.M. Rose, and D. Greenstein. 2000. EMB-30: an APC4 homologue required for metaphase-to-anaphase transitions during meiosis and mitosis in *Caenorhabditis elegans*. *Mol Biol Cell.* 11:1401-1419.
- Gard, D.L., and M.W. Kirschner. 1987. A microtubule-associated protein from *Xenopus* eggs that specifically promotes assembly at the plus-end. *J Cell Biol.* 105:2203-2215.
- Gergely, F., V.M. Draviam, and J.W. Raff. 2003. The ch-TOG/XMAP215 protein is essential for spindle pole organization in human somatic cells. *Genes Dev.* 17:336-341.
- Gigant, E., M. Stefanutti, K. Laband, A. Gluszek-Kustusz, F. Edwards, B. Lacroix, G. Maton, J.C. Canman, J.P. Welburn, and J. Dumont. 2017. Inhibition of ectopic microtubule assembly by the kinesin-13 KLP-7 prevents chromosome segregation and cytokinesis defects in oocytes. *Development.* 144:1674-1686.
- Gonczy, P., J.M. Bellanger, M. Kirkham, A. Poznaniowski, K. Baumer, J.B. Phillips, and A.A. Hyman. 2001. zyg-8, a gene required for spindle positioning in *C. elegans*, encodes a doublecortin-related kinase that promotes microtubule assembly. *Dev Cell.* 1:363-375.
- Goshima, G., R. Wollman, N. Stuurman, J.M. Scholey, and R.D. Vale. 2005. Length control of the metaphase spindle. *Curr Biol.* 15:1979-1988.
- Han, X., K. Adames, E.M. Sykes, and M. Srayko. 2015. The KLP-7 Residue S546 Is a Putative Aurora Kinase Site Required for Microtubule Regulation at the Centrosome in *C. elegans*. *PLoS One.* 10:e0132593.
- Heath, C.M., and S.M. Wignall. 2019. Chromokinesin Kif4 promotes proper anaphase in mouse oocyte meiosis. *Mol Biol Cell.* 30:1691-1704.
- Hollis, J.A., M.L. Glover, A.J. Schlientz, C.K. Cahoon, B. Bowerman, S.M. Wignall, and D.E. Libuda. 2020. Excess crossovers impede faithful meiotic chromosome segregation in *C. elegans*. *PLoS Genet.* 16:e1009001.
- Holubcova, Z., M. Blayney, K. Elder, and M. Schuh. 2015. Human oocytes. Error-prone chromosome-mediated spindle assembly favors chromosome segregation defects in human oocytes. *Science.* 348:1143-1147.
- Kamath, R.S., A.G. Fraser, Y. Dong, G. Poulin, R. Durbin, M. Gotta, A. Kanapin, N. Le Bot, S. Moreno, M. Sohrmann, D.P. Welchman, P. Zipperlen, and J. Ahringer. 2003. Systematic functional analysis of the *Caenorhabditis elegans* genome using RNAi. *Nature.* 421:231-237.
- Kosco, K.A., C.G. Pearson, P.S. Maddox, P.J. Wang, I.R. Adams, E.D. Salmon, K. Bloom, and T.C. Huffaker. 2001. Control of microtubule dynamics by Stu2p is essential for spindle orientation and metaphase chromosome alignment in yeast. *Mol Biol Cell.* 12:2870-2880.

- Laband, K., B. Lacroix, F. Edwards, J.C. Canman, and J. Dumont. 2018. Live imaging of *C. elegans* oocytes and early embryos. *Methods Cell Biol.* 145:217-236.
- Matthews, L.R., P. Carter, D. Thierry-Mieg, and K. Kemphues. 1998. ZYG-9, a *Caenorhabditis elegans* protein required for microtubule organization and function, is a component of meiotic and mitotic spindle poles. *J Cell Biol.* 141:1159-1168.
- McNally, K.P., M.T. Panzica, T. Kim, D.B. Cortes, and F.J. McNally. 2016. A novel chromosome segregation mechanism during female meiosis. *Mol Biol Cell.* 27:2576-2589.
- Mullen, T.J., A.C. Davis-Roca, and S.M. Wignall. 2019. Spindle assembly and chromosome dynamics during oocyte meiosis. *Curr Opin Cell Biol.* 60:53-59.
- Mullen, T.J., and S.M. Wignall. 2017. Interplay between microtubule bundling and sorting factors ensures acentriolar spindle stability during *C. elegans* oocyte meiosis. *PLoS Genet.* 13:e1006986.
- Muscat, C.C., K.M. Torre-Santiago, M.V. Tran, J.A. Powers, and S.M. Wignall. 2015. Kinetochore-independent chromosome segregation driven by lateral microtubule bundles. *eLife.* 4:e06462.
- Paix, A., A. Folkmann, D. Rasoloson, and G. Seydoux. 2015. High Efficiency, Homology-Directed Genome Editing in *Caenorhabditis elegans* Using CRISPR-Cas9 Ribonucleoprotein Complexes. *Genetics.* 201:47-54.
- Peset, I., J. Seiler, T. Sardon, L.A. Bejarano, S. Rybina, and I. Vernos. 2005. Function and regulation of Maskin, a TACC family protein, in microtubule growth during mitosis. *J Cell Biol.* 170:1057-1066.
- Redemann, S., I. Lantsch, N. Lindow, S. Prohaska, M. Srayko, and T. Muller-Reichert. 2018. A Switch in Microtubule Orientation during *C. elegans* Meiosis. *Curr Biol.* 28:2991-2997 e2992.
- Rivera Gomez, K., and M. Schvarzstein. 2018. Immobilization of nematodes for live imaging using an agarose pad produced with a Vinyl Record. *MicroPubl Biol.* 2018.
- Segbert, C., R. Barkus, J. Powers, S. Strome, W.M. Saxton, and O. Bossinger. 2003. KLP-18, a Klp2 kinesin, is required for assembly of acentrosomal meiotic spindles in *Caenorhabditis elegans*. *Mol Biol Cell.* 14:4458-4469.
- Severson, A.F., G. von Dassow, and B. Bowerman. 2016. Oocyte Meiotic Spindle Assembly and Function. *Curr Top Dev Biol.* 116:65-98.
- Srayko, M., T. O'Toole E, A.A. Hyman, and T. Muller-Reichert. 2006. Katanin disrupts the microtubule lattice and increases polymer number in *C. elegans* meiosis. *Curr Biol.* 16:1944-1949.
- Srayko, M., S. Quintin, A. Schwager, and A.A. Hyman. 2003. *Caenorhabditis elegans* TAC-1 and ZYG-9 form a complex that is essential for long astral and spindle microtubules. *Curr Biol.* 13:1506-1511.
- Sumiyoshi, E., Y. Fukata, S. Namai, and A. Sugimoto. 2015. *Caenorhabditis elegans* Aurora A kinase is required for the formation of spindle microtubules in female meiosis. *Mol Biol Cell.* 26:4187-4196.
- Thawani, A., R.S. Kadzik, and S. Petry. 2018. XMAP215 is a microtubule nucleation factor that functions synergistically with the gamma-tubulin ring complex. *Nat Cell Biol.* 20:575-585.
- Tournebize, R., A. Popov, K. Kinoshita, A.J. Ashford, S. Rybina, A. Pozniakovsky, T.U. Mayer, C.E. Walczak, E. Karsenti, and A.A. Hyman. 2000. Control of microtubule dynamics by the antagonistic activities of XMAP215 and XKCM1 in *Xenopus* egg extracts. *Nat Cell Biol.* 2:13-19.
- van der Voet, M., C.W. Berends, A. Perreault, T. Nguyen-Ngoc, P. Gonczy, M. Vidal, M. Boxem, and S. van den Heuvel. 2009. NuMA-related LIN-5, ASPM-1, calmodulin and dynein promote meiotic spindle rotation independently of cortical LIN-5/GPR/Galpha. *Nature cell biology.* 11:269-277.

- Widlund, P.O., J.H. Stear, A. Pozniakovsky, M. Zanic, S. Reber, G.J. Brouhard, A.A. Hyman, and J. Howard. 2011. XMAP215 polymerase activity is built by combining multiple tubulin-binding TOG domains and a basic lattice-binding region. *Proc Natl Acad Sci U S A*. 108:2741-2746.
- Wignall, S.M., and A.M. Villeneuve. 2009. Lateral microtubule bundles promote chromosome alignment during acentrosomal oocyte meiosis. *Nature cell biology*. 11:839-844.
- Wolff, I.D., J.A. Hollis, and S.M. Wignall. 2021. Acentrosomal spindle assembly and stability in *C. elegans* oocytes requires a kinesin-12 non-motor microtubule interaction domain. *bioRxiv:2021.2006.2017.448874*.
- Wolff, I.D., M.V. Tran, T.J. Mullen, A.M. Villeneuve, and S.M. Wignall. 2016. Assembly of *C. elegans* acentrosomal spindles occurs without evident MTOCs and requires microtubule sorting by KLP-18/kinesin-12 and MESP-1. *Mol Biol Cell*. 27:3122-3131.
- Woodruff, J.B., B. Ferreira Gomes, P.O. Widlund, J. Mahamid, A. Honigmann, and A.A. Hyman. 2017. The Centrosome Is a Selective Condensate that Nucleates Microtubules by Concentrating Tubulin. *Cell*. 169:1066-1077 e1010.
- Yang, H.Y., P.E. Mains, and F.J. McNally. 2005. Kinesin-1 mediates translocation of the meiotic spindle to the oocyte cortex through KCA-1, a novel cargo adapter. *J Cell Biol*. 169:447-457.
- Yang, H.Y., K. McNally, and F.J. McNally. 2003. MEI-1/katanin is required for translocation of the meiosis I spindle to the oocyte cortex in *C. elegans*. *Dev Biol*. 260:245-259.
- Zanic, M., P.O. Widlund, A.A. Hyman, and J. Howard. 2013. Synergy between XMAP215 and EB1 increases microtubule growth rates to physiological levels. *Nat Cell Biol*. 15:688-693.
- Zhang, L., J.D. Ward, Z. Cheng, and A.F. Dernburg. 2015. The auxin-inducible degradation (AID) system enables versatile conditional protein depletion in *C. elegans*. *Development*.
